# 1 **Horizontal gene transfer by natural transformation promotes both** 2 **genetic and epigenetic inheritance of traits**

3  
4 Ankur B. Dalia<sup>1,\*</sup> and Triana N. Dalia<sup>1</sup>

5  
6 <sup>1</sup>Department of Biology, Indiana University, Bloomington, IN 47405.

7 \* Author for correspondence: [ankdalia@indiana.edu](mailto:ankdalia@indiana.edu)

## 8 9 **Abstract**

10 Natural transformation (NT) is a major mechanism of horizontal gene transfer in microbial  
11 species that promotes the spread of antibiotic resistance determinants and virulence factors.  
12 Here, we develop a cell biological approach to characterize the spatial and temporal dynamics  
13 of homologous recombination during NT in *Vibrio cholerae*. Our results directly demonstrate (1)  
14 that transforming DNA efficiently integrates into the genome as single-stranded DNA, (2) that  
15 the resulting heteroduplexes are resolved by chromosome replication and segregation, and (3)  
16 that integrated DNA is rapidly expressed prior to cell division. We show that the combination of  
17 these properties results in the epigenetic transfer of gene products within transformed  
18 populations, which can support the transgenerational epigenetic inheritance of antibiotic  
19 resistance in both *V. cholerae* and *Streptococcus pneumoniae*. Thus, beyond the genetic  
20 acquisition of novel DNA sequences, NT can also promote the epigenetic inheritance of traits  
21 during this conserved mechanism of horizontal gene transfer.

## 22 23 **Introduction**

24 Microbes can share genetic material with one another via a variety of mechanisms that are  
25 cumulatively termed horizontal gene transfer (HGT). One broadly conserved mechanism for  
26 HGT is natural transformation (NT), which is a process whereby some microbial species can  
27 take up free DNA from the environment and subsequently integrate it into their genome by  
28 homologous recombination. This process is clinically relevant because NT is a property of many  
29 bacterial pathogens and can promote the acquisition and spread of antibiotic resistance  
30 determinants and virulence factors (Blokesch, 2016; Lorenz and Wackernagel, 1994). Despite  
31 90 years of research since the discovery of NT (Griffith, 1928), many aspects of DNA integration  
32 during this process remain unclear.

33  
34 During NT, cells generally interact with double-stranded DNA (dsDNA) in the environment, but  
35 only a single strand of this DNA is translocated into the cytoplasm (Gabor and Hotchkiss, 1966;  
36 Lacks, 1962; Piechowska and Fox, 1971). Upon uptake into the cytoplasm, this single-stranded  
37 DNA (ssDNA) is rapidly decorated by proteins including DprA and the recombination protein  
38 RecA (Kidane and Graumann, 2005; Mortier-Barriere et al., 2007). Prior work provides  
39 molecular evidence to suggest that this ssDNA can be directly integrated into the genome  
40 (Dubnau and Davidoff-Abelson, 1971; Fox and Allen, 1964; Mejean and Claverys, 1984). Thus,  
41 the ssDNA-RecA complex likely undergoes a homology search with the genome and RecA  
42 subsequently promotes strand invasion to generate a three-stranded D-loop intermediate.

1 Following strand invasion, the branches of the D-loop are then likely extended via a process  
2 known as branch migration. Indeed, recent work has identified natural transformation specific  
3 branch migration factors (Marie et al., 2017; Nero et al., 2018). Following branch migration, it is  
4 hypothesized that this three-stranded complex is then processed by an unresolved mechanism  
5 to generate a stable heteroduplex between the integrated transforming DNA (tDNA) and the  
6 genome. This heteroduplex could then be subjected to repair (e.g. via the mismatch repair  
7 system) or it is hypothesized that chromosome replication is required to resolve and segregate  
8 this heteroduplex. Direct evidence for many of the steps in this model of recombination,  
9 however, remains lacking.

10  
11 Here, we develop and employ novel cell biological markers to test this model and extend our  
12 mechanistic understanding of the spatial and temporal dynamics of DNA integration during NT  
13 in single cells. Furthermore, this analysis has revealed that beyond the actual horizontal transfer  
14 of DNA, NT promotes an unappreciated mechanism for epigenetic inheritance that has broad  
15 implications for the spread of traits by this mode of horizontal gene transfer.

## 16 17 **Results**

18 *ComM fluorescent fusions serve as a marker for homologous recombination during NT.*

19 There are currently no tools available to determine when cells are actively undergoing  
20 homologous recombination during NT, which has limited our understanding of this process.  
21 Fluorescent fusions to RecA do not fulfill this need because RecA interacts with ssDNA  
22 immediately upon uptake (Kidane and Graumann, 2005; Seitz and Blokesch, 2014); thus,  
23 making it difficult to distinguish between uptake of ssDNA into the cytoplasm from active  
24 integration into the chromosome. Also, recent work highlights the use of fluorescently labeled  
25 DNA to track the progress of DNA uptake and integration during NT (Boonstra et al., 2018;  
26 Corbinais et al., 2016); however, this approach suffers from the same shortfall. Recent work  
27 from our group has demonstrated that ComM is a hexameric helicase required for branch  
28 migration during NT in *V. cholerae* (Nero et al., 2018). We found that purified ComM only  
29 formed hexamers *in vitro* in the presence of ATP and ssDNA (Nero et al., 2018). Thus, we  
30 hypothesized that ComM may form active multimeric complexes specifically at the site of tDNA  
31 integration *in vivo*. To test this, we assessed the localization of a functional fluorescent fusion of  
32 ComM (Nero et al., 2018) in a constitutively competent strain of *V. cholerae* that exhibits high  
33 rates of natural transformation (transformation frequencies of up to ~50%) (Ellison et al., 2018).  
34 In the absence of any tDNA, GFP-ComM remained diffusely localized in the cytoplasm. In the  
35 presence of tDNA, however, GFP-ComM formed transient foci (**Fig. 1A-C**). We hypothesized  
36 that these foci represented the site of homologous recombination; specifically, sites of branch  
37 migration downstream of RecA-mediated strand invasion. Consistent with this, we did not  
38 observe any GFP-ComM foci in  $\Delta recA$  or  $\Delta dprA$  mutant backgrounds when cells were incubated  
39 with tDNA.

40  
41 Next, we wanted to further test whether ComM foci represented the site of homologous  
42 recombination during NT. To that end, we used two orthologous ParB/*parS* systems (Nielsen et

1 al., 2006) to mark distinct locations of the *V. cholerae* genome. Cells in this assay constitutively  
2 expressed two distinct fluorescent ParB fusion proteins (yGFP-ParB1 and CFP-ParB2), which  
3 can specifically bind to their corresponding *parS* sites (*parS1* and *parS2*, respectively). Binding  
4 of ParB to *parS* forms a fluorescent focus that demarcates the location of the chromosomal  
5 *parS* locus within the cell. A *parS1* site was integrated proximal to the terminus, while a *parS2*  
6 site was integrated proximal to the origin. *V. cholerae* adopts a longitudinal ori-ter configuration  
7 during cell division (David et al., 2014; Fogel and Waldor, 2006), thus, this labeling scheme  
8 provides maximal spatial separation between the two *parS* foci. Next, we incubated cells with  
9 tDNA that would integrate in close proximity to (~10kb away from) the *parS2* site (**Fig. 1D**). If  
10 ComM foci formed at the site of homologous recombination, we would expect fluorescent ComM  
11 foci to colocalize with the *parS2* focus. Indeed, ~91% of the time, ComM foci colocalized with  
12 the *parS2* site (**Fig. 1E-F**). The few events where ComM foci formed distal to the *parS2* site  
13 (**Fig. S1A**) may represent attempts at illegitimate recombination, formation of ComM foci on  
14 tDNA independent of recombination, and/or a local loss of DNA compaction which results in  
15 spatial separation of the ComM and *parS2* foci. In some instances, ComM foci exhibited  
16 colocalized movement with the *parS2* site (**Fig. S1B**), which further supported the hypothesis  
17 that ComM foci formed at the site of DNA integration. Also, we performed the reciprocal  
18 experiment by incubating cells with tDNA that would integrate in close proximity (~10kb away  
19 from) to the *parS1* site. As expected, ComM foci colocalized with the *parS1* site ~90% of the  
20 time (**Fig. S1C-E**). Cumulatively, these results indicate that fluorescent ComM foci demarcate  
21 the site of homologous recombination during NT. Furthermore, these data establish that cell  
22 biological tracking of ComM and orthologous ParB/*parS* systems provides a robust spatial and  
23 temporal readout for homologous recombination in single cells.

24  
25 *Tracking ComM allows for quantification of the success rate for homologous recombination*  
26 *during NT*

27 It is currently unclear how efficacious the process of homologous recombination is during NT  
28 (i.e. how often does homologous recombination succeed after the process is initiated?). In fact,  
29 this is relatively poorly understood in most models of recombination. Above, we demonstrated  
30 that the formation of ComM foci at the site of DNA integration likely represent independent  
31 attempts at tDNA integration downstream of RecA-mediated strand invasion. These ComM foci  
32 do not, however, indicate whether these attempts were ultimately successful at integrating DNA  
33 or not. We hypothesized that if we could quantify the cells where integration succeeded, we  
34 would have a powerful metric to assess the efficacy of integration during NT. To assess  
35 successful tDNA integration, we used a strain that constitutively expressed CyPET-ParB1 and  
36 initially lacked a cognate *parS1* site, which resulted in diffuse CyPET-ParB1 localization. We  
37 then transformed these cells with tDNA that would integrate a *parS1* site into the genome. Upon  
38 successful tDNA integration, a *parS1* site would be formed resulting in the formation of a  
39 CyPET-ParB1 focus. These cells also expressed a GFP-ComM fusion. Thus in this experiment,  
40 we could assess attempts at tDNA integration by tracking the formation of GFP-ComM foci and  
41 identify cells where tDNA integration succeeded by tracking the formation of CyPET-ParB1 foci.

42

1 First, we incubated cells with tDNA that would insert a 148bp *parS1* site into the genome (i.e.  
2  $\Delta 0\text{kb}::\text{parS1}$ ). We found that ~80% of cells generated at least one ComM focus during the  
3 duration of the experiment (**Fig. 2A-C**); however, only a subset of these cells produced a ParB1  
4 focus (**Fig. 2A**), indicating that many attempts (as assessed by ComM foci) ultimately failed to  
5 successfully integrate tDNA. Based on this, we could calculate a success rate for tDNA  
6 integration. The success rate on a per cell basis, defined as the percentage of cells that  
7 attempted to integrate tDNA (i.e. formed at least 1 ComM focus) that ultimately succeeded (i.e.  
8 formed a ParB1 focus) was ~45% (**Fig. 2D**). However, many cells produced more than one  
9 ComM focus throughout the duration of the experiment (**Fig. 2A-C**). If we assume that only a  
10 single ComM focus is required for successful tDNA integration we can also calculate the  
11 success rate on a per attempt (i.e. per focus) basis. This is defined as the percentage of cells  
12 that formed a ParB1 focus relative to the total number of ComM foci observed. The success rate  
13 per attempt observed was ~25% (**Fig. 2D**). Interestingly, there was no difference in the duration  
14 of GFP-ComM foci when we compare cells that ultimately succeeded vs failed to integrate tDNA  
15 (**Fig. 2E**). This suggests that the duration of the ComM-dependent branch migration complex  
16 does not predict successful integration. We did, however, observe a slight increase in the  
17 number of ComM foci produced in cells that ultimately succeeded to integrate tDNA (**Fig. 2F**).  
18

19 The transformation frequency for introducing large insertions and deletions by natural  
20 transformation is lower than when integrating smaller mutational cargo (Dalia et al., 2014). If  
21 ComM foci truly represent attempts at DNA integration, we hypothesized that when using tDNA  
22 that would introduce a large deletion, that the number of ComM foci formed (i.e. the number of  
23 attempts) would remain unchanged, while the success rate would be reduced. To test this, we  
24 performed an assay using cells where the targeted integration site already contained a ~1.5kb  
25 chloramphenicol resistance ( $\text{Cm}^R$ ) cassette. Thus, integration of the *parS1* site would require  
26 cells to delete the 1.5kb  $\text{Cm}^R$  cassette and replace it with the *parS1* site (i.e.  $\Delta 1.5\text{kb}::\text{parS1}$ ),  
27 while the cells used in the prior experiment merely had to insert the *parS1* site into the genome  
28 (i.e.  $\Delta 0\text{kb}::\text{parS1}$ ). For  $\Delta 1.5\text{kb}::\text{parS1}$ , we found that cells generated just as many ComM foci as  
29 for  $\Delta 0\text{kb}::\text{parS1}$ , indicating that cells were attempting to integrate tDNA at the same rate (**Fig.**  
30 **2A-C**). Importantly, the arms of homology in the tDNA were identical in both experiments. Thus,  
31 this result is consistent with RecA-mediated strand invasion in one arm of homology occurring at  
32 equal efficiencies regardless of the nature of the mutation being introduced. The duration of  
33 ComM foci and the number of foci generated per cell were not markedly different between  
34  $\Delta 1.5\text{kb}::\text{parS1}$  and  $\Delta 0\text{kb}::\text{parS1}$  (**Fig. 2E-H**). The success rate, however, was approximately half  
35 for  $\Delta 1.5\text{kb}::\text{parS1}$  compared to  $\Delta 0\text{kb}::\text{parS1}$  (**Fig. 2D**). Thus, deletion of ~1.5kb results in an ~2-  
36 fold reduction in the success rate for integration. Because the number of attempts at DNA  
37 integration were equivalent between  $\Delta 1.5\text{kb}::\text{parS1}$  and  $\Delta 0\text{kb}::\text{parS1}$ , the success rate  
38 calculated here is indicative of the processes that must occur downstream of RecA-mediated  
39 strand invasion, which include ComM-dependent branch migration.  
40

41 In both of the experiments described above, formation of the ParB1 focus (i.e. the indicator for  
42 successful tDNA integration) was temporally delayed from the formation of ComM foci.

1 Integration of ssDNA, as hypothesized for NT, might account for this delay because a single-  
2 stranded *parS* site is not sufficient to bind to parB (Pillet et al., 2011). Thus, we would expect  
3 that a ParB1 focus would only form after the *parS1* site is converted into dsDNA (e.g. via  
4 chromosome replication). Consistent with this hypothesis, we consistently observed that only  
5 one of the two daughter cells inherited a ParB1 focus, and in the subsequent round of division  
6 both daughter cells inherited a ParB1 focus (**Fig. 2A**). We therefore hypothesized that tDNA  
7 integrates as ssDNA and the resulting heteroduplex is resolved by chromosome replication,  
8 which we test further below.

9

10 *tDNA integrates as ssDNA during NT to form a heteroduplex that is resolved by chromosome*  
11 *replication*

12 Decades of research has provided molecular evidence that tDNA likely integrates into the  
13 genome as ssDNA during NT (Dubnau and Davidoff-Abelson, 1971; Fox and Allen, 1964;  
14 Mejean and Claverys, 1984). To provide more direct and quantitative evidence for this, we  
15 started with cells that constitutively expressed yGFP-ParB1/CFP-ParB2 and contained a single  
16 *parS2* site. We then transformed these cells with tDNA that would replace the *parS2* site with a  
17 *parS1* site. If ssDNA integrates during NT, then we would expect chromosome replication to  
18 generate two genomes, where one has a *parS1* site and the other has a *parS2* site. This would  
19 be observed experimentally as predivisional cells that contain both green ParB1 and cyan  
20 ParB2 foci (**Fig. 3A**). Alternatively, if tDNA is integrated as dsDNA into the genome, we should  
21 only observe cells that exclusively have ParB1 or ParB2 foci (**Fig. S2A**). When we performed  
22 this experiment, we found that ~94% of cells exhibited a phenotype consistent with the  
23 integration of ssDNA (**Fig. 3B-C, Fig. S2B, and movie S1**). For cells that exhibited ssDNA  
24 integration, we found that cells faithfully replicated their chromosomes in the next round of  
25 division (i.e. the daughter cell that inherited the *parS1* site in the first round of division then  
26 replicated to form two *parS1* foci in the subsequent round of chromosome replication) (**Fig. 3B**).  
27 The observation of dsDNA integration in ~6% of cells may be the result of uptake and  
28 integration of multiple tDNA molecules that replace both the leading and lagging strands of the  
29 endogenous genome. This is not unprecedented because it is well established that naturally  
30 transformable species can take up and integrate multiple independent tDNA molecules in a  
31 process termed congression or cotransformation (Dalia et al., 2014; Nester et al., 1963). These  
32 data indicate that during NT, cells predominantly integrate ssDNA into the genome and that the  
33 resulting heteroduplex is resolved by chromosome replication and segregation.

34

35 *ComM-dependent branch migration immediately precedes DNA integration during NT*

36 Previously, we used insertion of a *parS1* site to identify cells that successfully integrated DNA  
37 (**Fig. 2**). Because cells integrate ssDNA, however, they only generated a ParB1 focus after  
38 chromosome replication, which delayed the readout for successful integration from the time that  
39 integration actually occurred. To test whether we could generate a more sensitive temporal  
40 indicator of tDNA integration, we used a modified experimental approach by assessing the  
41 disruption of an established *parS* site (**Fig. S3A**). We started with cells that constitutively  
42 expressed yGFP-ParB1/CFP-ParB2 and harbored *parS1* and *parS2* sites in close proximity

1 (~10kb apart) on the chromosome, with the *parS1* site disrupting a *gfp* gene. These strains also  
2 contained an mCherry-ComM fusion expressed at the native locus. We then transformed these  
3 cells with tDNA that would delete the *parS1* site and restore the *gfp* gene. Thus, we can assess  
4 the spatial and temporal relationship between ComM activity (i.e. mCherry-ComM foci) and  
5 tDNA integration (i.e. loss of the ParB1 focus). The presence of a constant ParB2 focus served  
6 as a control for local rearrangements of the genome (which should disrupt both ParB1 and  
7 ParB2 foci), while specific tDNA integration should only result in loss of the ParB1 focus. As a  
8 secondary indicator of successful tDNA integration (beyond the loss of the ParB1 focus),  
9 transformed cells should express high levels of GFP above the baseline fluorescence of the  
10 yGFP-ParB1 construct once the *gfp* gene is restored. When we performed this experiment, we  
11 found that loss of the ParB1 focus was immediately preceded by the formation of a colocalized  
12 ComM focus (**Fig. S3B**). ParB1 then remained diffusely localized until chromosome replication,  
13 as evidenced by the splitting of the ParB2 focus, whereupon we saw reappearance of one  
14 ParB1 focus (**Fig. S3B**). This is consistent with ssDNA integration of tDNA into the genome  
15 because chromosome replication would be expected to restore the *parS1* site from the DNA  
16 strand that was not replaced (**Fig. S3A**). Following chromosome replication, GFP expression  
17 increased, which further confirmed that cells were transformed (**Fig. S3B**). These results  
18 indicate that DNA integration occurs rapidly following the formation of ComM foci and that  
19 monitoring the loss of an established *parS* site (i.e. a ParB focus) provides the most immediate  
20 readout for homologous recombination during NT.

21  
22 *Expression of integrated tDNA occurs rapidly after chromosome replication and prior to cell*  
23 *division*

24 The experiments described above established the spatial and temporal link between ComM  
25 dependent branch migration and tDNA integration. Assessing the exact timing of integrated  
26 tDNA in these experiments, however, was complicated by the fact that cells already expressed  
27 a baseline amount of yGFP-ParB1 (**Fig S3B**). This made it difficult to determine the exact timing  
28 of expression for the repaired *gfp* gene following DNA integration because it was assessed in  
29 the same fluorescent channel as yGFP-ParB1.

30  
31 To better define when integrated tDNA was expressed, we altered the experimental setup so  
32 that the expression of integrated tDNA was assessed in a distinct fluorescent channel (**Fig. 4A**).  
33 We generated strains that expressed mCherry-ParB1/CFP-ParB2 and harbored *parS1* and  
34 *parS2* sites in close proximity on the genome where the *parS1* site disrupted a *gfp* gene. Cells  
35 were then transformed with tDNA to delete the *parS1* site and restore the *gfp* gene (**Fig. 4A**).  
36 Due to a lack of available fluorescent channels, ComM was not tracked in these experiments;  
37 however, tracking ComM activity was not critical to assess the timing of tDNA expression. When  
38 we performed these experiments, we observed tDNA integration as the loss of the ParB1 focus  
39 and subsequent restoration of this focus upon chromosome replication (**Fig. 4B, movie S2**),  
40 which is consistent with ssDNA integration as observed previously (**Fig. 3B**). This analysis also  
41 revealed that integrated tDNA was rapidly expressed following chromosome replication (**Fig.**  
42 **4B, movie S2**). The delay to *gfp* expression following chromosome replication was ~15 mins

1 (**Fig. 4C**), while the doubling time in these assays was ~3 hours. The maturation time for the *gfp*  
2 allele used is ~6.5 mins (Megerle et al., 2008). Thus, these results indicate that integrated tDNA  
3 is expressed almost immediately following chromosome replication, which resolves the  
4 integrated heteroduplex.

5

6 *NT promotes transgenerational epigenetic inheritance of antibiotic resistance during NT*

7 Because tDNA is integrated as ssDNA, the predivisional transformed cell has two genomes of  
8 distinct genotypes following chromosome replication – one where the *gfp* gene is still mutated  
9 (**Fig. 4B** – the genome represented by the colocalized ParB1/ParB2 foci) and one where the *gfp*  
10 gene is repaired (i.e. **Fig. 4B** - the genome represented by the independent parB2 focus).  
11 Expression of the integrated tDNA (from the restored *gfp* gene) in this predivisional cell occurred  
12 prior to cell division. Thus, despite the fact that one of the daughter cells is genotypically a *gfp*  
13 mutant, it still epigenetically inherits a significant amount of the GFP gene product derived from  
14 the tDNA integrated into its sibling.

15

16 While epigenetic inheritance of GFP may be inconsequential, there may be important contexts  
17 in which the epigenetic inheritance of tDNA-derived products can provide a benefit. One  
18 instance could be in the context of antibiotic resistance where epigenetic inheritance of an  
19 antibiotic resistance gene product could transiently protect the sibling of a transformed cell. We  
20 setup an experimental approach to directly test this hypothesis (**Fig. S4A-B**). We started with  
21 cells that had a chloramphenicol resistance marker ( $\text{Cm}^{\text{R}}$ ) integrated into their genome. We then  
22 transformed these cells with tDNA that would replace the  $\text{Cm}^{\text{R}}$  marker with a kanamycin  
23 resistance marker ( $\text{Kan}^{\text{R}}$ ). So, the genotype of cells in this experiment should theoretically be  
24 exclusively  $\text{Cm}^{\text{R}}$  or  $\text{Kan}^{\text{R}}$  (**Fig. S4A**). Upon tDNA integration and subsequent chromosome  
25 replication, we would expect predivisional cells to have 2 distinct genomes – one that is  $\text{Cm}^{\text{R}}$   
26 and the other that is  $\text{Kan}^{\text{R}}$  (**Fig. S4A**). Because integrated tDNA is expressed rapidly following  
27 chromosome replication and prior to cell division, we expect that the  $\text{Kan}^{\text{R}}$  gene product should  
28 be inherited by both the  $\text{Kan}^{\text{R}}$  daughter cell and the  $\text{Cm}^{\text{R}}$  daughter cell. Thus, the genetically  
29  $\text{Cm}^{\text{R}}$  siblings of transformed cells may be phenotypically resistant to kanamycin (**Fig. S4A**). To  
30 assess this, we challenged these transformation reactions with a lethal dose of kanamycin to kill  
31 susceptible cells (**Fig. S4B**). Cells were then washed to remove the kanamycin and plated for  
32 quantitative culture on selective plates to determine the number of genetically  $\text{Kan}^{\text{R}}$  and  $\text{Cm}^{\text{R}}$   
33 cells that survived the kanamycin treatment (**Fig. S4B**). We also assessed the number of  
34 illegitimate recombinants (i.e. transformants where the  $\text{Kan}^{\text{R}}$  marker was integrated at a locus  
35 other than the intended site), which would be genetically  $\text{Kan}^{\text{R}}+\text{Cm}^{\text{R}}$ .

36

37 As expected, when cells were not incubated with any tDNA, very few ( $\sim 10^3$ ) genetically  $\text{Cm}^{\text{R}}$  or  
38  $\text{Kan}^{\text{R}}$  cells survived the kanamycin treatment (**Fig. 5A-C, 0 min white bars**). When cells were  
39 incubated with  $\text{Kan}^{\text{R}}$  tDNA, there were  $\sim 10^7$  genetically  $\text{Kan}^{\text{R}}$  cells that survived the kanamycin  
40 treatment (**Fig 5B, 0 min black bars**), which represents the number of genetic transformants  
41 generated (i.e. the number of cells that actually integrated the  $\text{Kan}^{\text{R}}$  tDNA into their genome).  
42 We also observed that a similar number of genetically  $\text{Cm}^{\text{R}}$  cells survived the kanamycin

1 treatment (**Fig. 5A, 0 min black bars**), and importantly, this was ~4 logs greater than the  
2 number of illegitimate recombinants observed (**Fig. 5C, 0 min black bars**). The genetically Cm<sup>R</sup>  
3 cells that survived the kanamycin treatment represent cells that are phenotypically Kan<sup>R</sup>, likely  
4 through epigenetic inheritance of the Kan<sup>R</sup> gene product from their transformed sibling.  
5 Interestingly, of all cells that survived the kanamycin treatment, ~25% of these cells were Cm<sup>R</sup>  
6 (**Fig. 5D, 0 min**). The theoretical maximum if every transformed cell protected its sibling would  
7 be 50%. Thus, these results indicate that ~1 in every 2 transformants conveyed epigenetic  
8 kanamycin resistance to its untransformed sibling.

9  
10 As noted above, the phenotypic kanamycin resistance observed in genetically Cm<sup>R</sup> cells is likely  
11 the result of epigenetic inheritance of the Kan<sup>R</sup> gene product. Because these cells do not have  
12 the capacity to continue to produce the Kan<sup>R</sup> gene product, we would expect that the gene  
13 product and resulting phenotypic kanamycin resistance should dilute out in these cells through  
14 growth. So next, we wanted to determine how many generations phenotypic kanamycin  
15 resistance was maintained in genetically Cm<sup>R</sup> cells. To test this, we performed the same  
16 experiment described above, however, we outgrew reactions in rich medium for 60, 120, 180,  
17 and 240 mins prior to subjecting them to the kanamycin treatment (**Fig. S4B**). Surprisingly, we  
18 found that phenotypic kanamycin resistance was maintained in some portion of Cm<sup>R</sup> cells even  
19 out to 240 mins of outgrowth, which represents ~11 generations of growth (**Fig. 5A**). We did,  
20 however, see that the percentage of cells that were Cm<sup>R</sup> following the kanamycin treatment  
21 dropped significantly after 180 mins of outgrowth (**Fig. 5D**). But this ratio was consistently  
22 maintained for 120 mins of outgrowth, which represents ~5-6 generations of growth. Thus,  
23 these data indicate that the epigenetic inheritance of phenotypic kanamycin resistance is  
24 maintained for an extended number of generations.

25  
26 To determine if integration of tDNA was required to confer epigenetic kanamycin resistance we  
27 performed this assay in  $\Delta recA$  and  $\Delta comM$  mutant backgrounds. The  $\Delta recA$  strain, as expected,  
28 did not produce any Kan<sup>R</sup> transformants and there was no phenotypic kanamycin resistance  
29 observed in Cm<sup>R</sup> cells (**Fig. S4C**). Prior work, however, indicates that tDNA is less stable in the  
30 cytoplasm of  $\Delta recA$  mutants (Berge et al., 2003). The  $\Delta comM$  strain on the other hand has an  
31 ~100-fold lower transformation frequency compared to the parent, while DNA uptake and  
32 stability of tDNA in the cytoplasm remains unchanged (Nero et al., 2018). In the  $\Delta comM$  mutant,  
33 we observed an ~100-fold reduction in the number of transformants (i.e. Kan<sup>R</sup> cells) and a  
34 corresponding decrease in the number of Cm<sup>R</sup> cells that survived the kanamycin treatment (**Fig.**  
35 **S4C**), which is consistent with tDNA integration being required for epigenetic inheritance of  
36 kanamycin resistance. Transgenerational epigenetic inheritance of antibiotic resistance is not  
37 unique to Kan<sup>R</sup> because similar results were obtained when using tDNA containing a  
38 spectinomycin resistance cassette (Spec<sup>R</sup>) and challenging cells with a lethal dose of  
39 spectinomycin (**Fig. S4D**).

40  
41 We also tested epigenetic inheritance of antibiotic resistance in the model Gram-positive  
42 naturally transformable species *Streptococcus pneumoniae*. Transformation of *S. pneumoniae*



1 with Kan<sup>R</sup> tDNA conferred transgenerational phenotypic kanamycin resistance to untransformed  
2 cells (**Fig. 5E-H**), which likely occurred through epigenetic inheritance of the Kan<sup>R</sup> gene product  
3 as observed in *V. cholerae* (**Fig. 5A-D**).

4  
5 Other antibiotics/resistance determinants could not be tested using the experimental approach  
6 described above due to a requirement for the antibiotic to exhibit bactericidal activity following a  
7 high dose, short duration exposure. Therefore, we sought to establish a microscopy-based  
8 assay that would allow us to directly observe epigenetic inheritance of antibiotic resistance in  
9 single cells, which would be amenable to testing non-bactericidal antibiotics. To that end, we  
10 generated strains that constitutively expressed mCherry-ParB1/CFP-ParB2 and had a single  
11 *parS1* site disrupting a *gfp* gene (i.e. *gfp::parS1*). These cells were then transformed with tDNA  
12 that would simultaneously remove the *parS1* site, repair the *gfp* gene, and integrate a *parS2* site  
13 linked to an antibiotic resistance marker (Ab<sup>R</sup>) (**Fig. S5A**). Thus, following tDNA integration and  
14 subsequent chromosome replication, predivisional transformed cells would have one genome  
15 that represents the parent genotype (i.e. the untransformed sibling = *gfp::parS1*, Ab<sup>S</sup>), while the  
16 other genome will represent the transformed genotype (i.e. the transformed sibling = *parS2*, *gfp*  
17 intact, and Ab<sup>R</sup>). Based on our previous results, we would expect the untransformed sibling to  
18 epigenetically inherit tDNA-derived gene products from its transformed sibling, which would  
19 allow it to grow on the antibiotic despite the fact that it does not actually encode an Ab<sup>R</sup> marker.  
20 Indeed, this was exactly what we observed using tDNA containing a Kan<sup>R</sup> marker (**Fig. 6, movie**  
21 **S3**), which also validated the results described above (**Fig. 5A-D**). Furthermore, when we  
22 performed this experiment using tDNAs that conferred resistance to other antibiotics  
23 (erythromycin and chloramphenicol), similar results were obtained (**Fig. S5B-C, movies S4-S5**),  
24 indicating that transgenerational epigenetic inheritance of antibiotic resistance during NT is not  
25 limited to bactericidal aminoglycosides like kanamycin and spectinomycin.

## 26 27 **Discussion**

28 Our results provide direct evidence to validate the current model of tDNA integration during NT.  
29 Furthermore, they have provided invaluable insight into the spatial and temporal dynamics  
30 during the integration process at single cell resolution, which ultimately revealed an  
31 unappreciated mechanism for epigenetic inheritance during NT. Specifically, we provide direct  
32 and quantitative evidence that tDNA integrates as ssDNA into the genome. These results  
33 support decades of prior molecular work (Dubnau and Davidoff-Abelson, 1971; Fox and Allen,  
34 1964; Mejean and Claverys, 1984). We demonstrate that following integration of ssDNA that the  
35 resulting heteroduplex is resolved by chromosome replication and segregation, which forms  
36 predivisional cells harboring genomes of two distinct genotypes (one containing the integrated  
37 DNA and the other lacking it). We also found that integrated tDNA is rapidly expressed  
38 immediately following chromosome replication, which occurs before cell division under the  
39 conditions tested. Importantly, we show that the combination of these properties - ssDNA  
40 integration, resolution of heteroduplexes by chromosome replication, and the rapid expression  
41 of tDNA in predivisional cells – allows for the epigenetic transfer of tDNA derived gene products  
42 to the untransformed siblings of transformed cells. Here, we observed evidence for epigenetic

1 inheritance during NT in both *V. cholerae* and *S. pneumoniae*. Thus, it is likely that the  
2 mechanism for epigenetic inheritance described here is broadly applicable to this mode of  
3 horizontal gene transfer. In support of this, recent studies have shown that the expression of  
4 integrated DNA prior to cell division likely also occurs in naturally transformable *Helicobacter*  
5 *pylori* and *Bacillus subtilis* (Boonstra et al., 2018; Corbinais et al., 2016).  
6

7 Our results demonstrate that fluorescent fusions of the branch migration factor ComM serve as  
8 a novel cell biological marker for homologous recombination during NT. Using this tool, we were  
9 able to quantify the success rate for DNA integration during NT *in vivo* as ~20-45% depending  
10 on the nature of the mutation being introduced. HGT by Hfr conjugation in *E. coli* was previously  
11 estimated to occur at an efficiency of ~96% (Babic et al., 2008). This was measured  
12 microscopically using conjugative transfer between Dam<sup>+</sup> Hfr donors and Dam<sup>-</sup> recipients  
13 containing SeqA-YFP, which binds and forms fluorescent foci on the hemi-methylated DNA that  
14 forms in recipients. If SeqA-YFP foci persisted for >4 hours, it was assumed that DNA was  
15 stably integrated into the genome. Our analysis on the success rates for homologous  
16 recombination during NT required integration of a defined DNA cargo (a *parS* site), while the  
17 prior analysis of HGT by Hfr was sequence-independent (Babic et al., 2008)(recombination of  
18 any region of the methylated Hfr donor DNA should still yield a seqA-YFP focus in the recipient).  
19 Thus, it is entirely possible that integration of donor DNA within the homology arms of tDNA in  
20 our assays occurred at a higher frequency than what was observed for integration of the *parS*  
21 site. However, we cannot currently estimate this using the same approach outlined above for *E.*  
22 *coli* because Dam is essential for viability in *V. cholerae*. The readouts we developed for  
23 attempts (ComM foci) and successful homologous recombination (integration of a *parS* site)  
24 during NT, however, provide a sensitive assay to measure the effects of different mutational  
25 cargo (insertions vs deletions) on the rates of homologous recombination. Because we  
26 observed similar rates of attempts for integration of different tDNAs (i.e. the number of ComM  
27 foci) despite differing rates of successful integration, this analysis also demonstrates that RecA-  
28 dependent homology searching / strand invasion are not affected by the mutational cargo  
29 because these steps precede the formation of ComM foci.  
30

31 It remains formally possible that epigenetic inheritance of gene products during NT is a mere  
32 byproduct of the integration process and does not confer any meaningful evolutionary  
33 advantage. We have, however, provided experimental evidence and further discussion below to  
34 highlight some potential advantages to this mode of epigenetic inheritance during NT.  
35 Experimentally, we demonstrate that epigenetic inheritance during NT can have important  
36 biological consequences for transformed populations using antibiotic resistance as an example.  
37 Specifically, we show that upon integration of tDNA encoding for an antibiotic resistance  
38 determinant that both the transformed cell and its untransformed sibling are both phenotypically  
39 resistant to the antibiotic. Perhaps most surprisingly, we found that this epigenetic inheritance of  
40 antibiotic resistance was long lasting and could confer resistance to untransformed cells for  
41 multiple generations. While we only observed growth of the untransformed cells for 3-5  
42 generations in the presence of the antibiotics (**Fig. 6, Fig. S5B-C, movie S3-S5**), our antibiotic

1 challenge assays suggest that tolerance to the drug may last significantly longer (**Fig. 5**).  
2 Natural environments are generally dynamic and exposure to stressors like antibiotics may only  
3 be transient. Thus, epigenetic inheritance during NT may provide an advantage in natural  
4 settings by providing transient resistance to these stressors. Interestingly, the resistance  
5 determinants used in this study act by different mechanisms (Kan<sup>R</sup>/Spec<sup>R</sup> = inactivate drug,  
6 Cm<sup>R</sup> = efflux pump, Erm<sup>R</sup> = modifies the drug target), however, all are enzymatic mechanisms  
7 of resistance. If cells inherit even small amounts of these enzymes they may confer phenotypic  
8 drug resistance, which could account for why resistance is maintained for multiple generations.  
9 The transgenerational epigenetic inheritance of any traits via this mode of horizontal transfer,  
10 however, is subject to the expression, stability, and activity of the gene products that confer  
11 them.

12  
13 There are three major modes of horizontal gene transfer that can modify bacterial genomes  
14 through recombination. These are natural transformation, conjugation, and phage transduction.  
15 Integration of ssDNA, which is required for the epigenetic transfer of traits by NT, is somewhat  
16 unique among these. Conjugation horizontally transfers a single strand of DNA into recipients;  
17 however, it is believed that the complementary strand is rapidly synthesized upon entering  
18 recipients prior to recombination (Willetts and Wilkins, 1984). Likewise, phage transduction can  
19 result from the injection of dsDNA or ssDNA, but the latter is believed to require complementary  
20 strand synthesis prior to successful recombination with the host genome (Kowalczykowski et al.,  
21 1994; van der Ende et al., 1983). Thus, there is no reason *a priori* why DNA must be  
22 translocated and integrated as ssDNA during NT, especially given the remarkably high rates of  
23 recombination observed for dsDNA (Babic et al., 2008). Thus, it is tempting to speculate that  
24 one reason cells integrate ssDNA during NT is to facilitate epigenetic transfer of gene products  
25 during the process. Induction of natural competence and/or successful natural transformation  
26 only occurs in a small subpopulation of cells within transformable populations, which is thought  
27 to occur as a bet-hedging strategy. This could be due to the fact that committing to the  
28 competence state incurs a fitness cost (Johnsen et al., 2009; Veening et al., 2008; Wylie et al.,  
29 2010). Alternatively, integration of tDNA from the environment, which can contain deleterious  
30 mutations, can be detrimental to the transformed cell (Moradigaravand and Engelstadter, 2013;  
31 Redfield, 1988). In our study, ~1/2 of all transformants shared tDNA-derived gene products with  
32 their untransformed siblings. The untransformed sibling that inherits these gene products  
33 obtains the potential benefit from the tDNA without having to incur the potential cost of  
34 integrating a deleterious mutation. Thus, epigenetic inheritance, as described in this study, may  
35 represent an additional layer of bet hedging to help ameliorate the fitness costs associated with  
36 horizontal gene transfer by NT.

### 37 38 **Acknowledgements**

39 We gratefully acknowledge CK Ellison and NG Greene for critical comments on the manuscript.  
40 We thank CK Ellison, NG Greene, YV Brun, DK Chatteraj and ME Winkler for helpful  
41 discussions. For strains and reagents related to pneumococcal experiments, we thank DA  
42 Morrison, ME Winkler, and HT Tsui. We thank RL Gourse and the FX Barre lab for plasmids

1 pFHC2973 and pEP74. We also thank YV Brun and members of his lab for assistance with  
2 microscopy and generous access to equipment. This work was supported by grants  
3 R35GM128674 and AI118863 from the National Institutes of Health to ABD.

#### 4 5 **Author Contributions**

6 ABD designed and coordinated the overall study. ABD and TND performed experiments and  
7 conducted data analysis. ABD wrote the manuscript. All authors contributed to editing the  
8 manuscript.

#### 9 10 **Competing Interests**

11 The authors declare no competing interests.

#### 12 13 **Methods**

##### 14 *Bacterial strains and culture conditions*

15 All *V. cholerae* strains used throughout the study were derived from the *V. cholerae* isolate  
16 E7946 (Miller et al., 1989). See **Table S1** for a detailed list of all strains used in this study. All *V.*  
17 *cholerae* strains were engineered to be constitutively naturally competent as previously  
18 described. Strains were routinely grown at 30°C or 37°C in LB Miller agar and broth (BD Difco)  
19 supplemented with 100 µM IPTG, 200 µg/mL spectinomycin, 50 µg/mL kanamycin, 10 µg/mL  
20 trimethoprim, 100 µg/mL streptomycin, 2 µg/mL chloramphenicol, 10 µg/mL erythromycin,  
21 and/or 50 µg/mL zeocin as appropriate.

22  
23 The *S. pneumoniae* strain used in this study was CP2137,  $\Delta$ cps  $\Delta$ comA derivative of strain Rx1  
24 which was generously provided by Dr. Donald Morrison (**Table S1**). All pneumococcal strains  
25 were routinely grown in CAT+GP (CAT = 10 g/L N-Z-Amine A, 5 g/L tryptone, 1 g/L yeast  
26 extract, and 5 g/L NaCl, which was supplemented with fresh 0.2% glucose and 16mM K<sub>2</sub>HPO<sub>4</sub>)  
27 and on Trypticase Soy Agar with 5% sheep's blood (BD BBL) supplemented with 0.3 µg/mL  
28 erythromycin and/or 250 µg/mL kanamycin as appropriate. Cultures in CAT+GP were grown  
29 statically at 37°C, while agar plates were incubated at 37°C in candle extinction jars.

##### 30 31 *Construction of mutant strains*

32 All *V. cholerae* and *S. pneumoniae* mutant strains were generated by SOE PCR and natural  
33 transformation, cotransformation, or MuGENT exactly as previously described (Dalia, 2018;  
34 Dalia et al., 2014; Dalia et al., 2017). For a list of all primers used in strain construction see  
35 **Table S2**. All mutants were confirmed by PCR and/or sequencing. The orthologous parB/S  
36 systems (yGFP- $\Delta$ 23ParB<sub>MT1</sub>/parS<sub>MT1</sub> = yGFP-ParB1/*parS1*; CFP- $\Delta$ 30ParB<sub>P1</sub>/parS<sub>P1</sub> = CFP-  
37 ParB2/*parS2*) were amplified from pFHC2973 (Nielsen et al., 2006)(*P<sub>lac</sub>-CFP-parB<sub>P1</sub> yGFP-*  
38 *parB<sub>MT1</sub>*) and pEP74 (*P<sub>lac</sub>-yGFP-parB<sub>MT1</sub>*) and integrated into the *lacZ* locus using the primers  
39 indicated in **Table S1**. The yGFP gene in the yGFP-parB1 constructs from these sources was  
40 replaced with mCherry or CyPet as indicated in **Table S1** using the primers indicated in **Table**  
41 **S2**.

42

## 1 *Imaging and analysis*

2 Unless otherwise indicated, cell were prepared by growing cells to late log in LB supplemented  
3 with 20 mM MgCl<sub>2</sub>, 10 mM CaCl<sub>2</sub>, and 100 μM IPTG. Cells were then washed once and  
4 resuspended in instant ocean medium (7 g/L; Aquarium Systems). Cells were then mixed with  
5 tDNA as indicated and placed under 0.2% gelzan pads made with instant ocean medium  
6 supplemented with 100 μM IPTG unless otherwise indicated. Phase contrast and fluorescence  
7 images were collected on a Nikon Ti-2 microscope using a Plan Apo ×60 objective, a YFP,  
8 CFP, and/or mCherry filter cube, a Hamamatsu ORCAFlash4.0 camera and Nikon NIS  
9 Elements imaging software. Cell numbers were quantified using MicrobeJ (Ducret et al., 2016).  
10 Time-lapse imaging was performed with an interval of between 1 min and 10 min as indicated.

11  
12 For tracking ComM foci, rare cells that started with a focus in timelapses (usually <<1%) were  
13 excluded from the analysis. Focus duration was determined by assessing the number of frames  
14 that ComM foci were evident. If ComM foci were separated by 2 or more frames they were  
15 considered independent events (i.e. scored as two ComM foci if there were two intervening  
16 frames that lacked foci). Based on the average duration of ComM foci being ~9 mins (**Fig. 1**,  
17 assessed via 1-min intervals), subsequent experiments were imaged at a 3-min intervals to  
18 allow for longer time lapses and to minimize photobleaching. To assess the percentage of cells  
19 that formed a ComM focus, the number of cells that produced at least one ComM focus within  
20 the duration of the time lapse was divided by the total number of cells analyzed. As a result,  
21 experiments that tracked cells for a shorter period of time yielded a lower percentage of cells  
22 that exhibited a ComM focus, while longer duration time lapses yielded a higher percentage of  
23 cells that exhibited a ComM focus (i.e. compare **Fig. 1** = 45 min time lapse to **Fig. 2** = 5 hour  
24 time lapse).

25  
26 Successful DNA integration using integration of a *parS1* site, was assessed by tracking the  
27 formation of a *de novo* CyPet-ParB1 focus within a cell via time-lapse microscopy. All ComM  
28 foci formed prior to the appearance of the CyPet-ParB1 focus were scored as independent  
29 attempts at DNA integration. The success rate was defined both on a 'per cell' basis and on a  
30 'per attempt' basis. For the per cell basis, this was defined as the percentage of the cells that  
31 succeeded to integrate the *parS1* site into their genome (which was observed as formation of a  
32 *de novo* CyPet-ParB1 focus in the cell) relative to the total number of cells that attempted to  
33 integrate DNA (i.e. the number of cells that generated at least one ComM focus). For the per  
34 attempt basis, this was defined as the percentage of cells that succeeded to integrate the *parS1*  
35 site into their genome (which was observed as formation of a *de novo* CyPet-ParB1 focus in the  
36 cell) relative to the total number of attempts at DNA integration observed (i.e. the total number  
37 of ComM foci observed). Those cells that succeeded to integrate the *parS* site were demarcated  
38 "Success", while those cells that attempted to integrate tDNA (i.e. formed a ComM focus) but  
39 ultimately failed to integrate the *parS* site were demarcated "Fail". The number and duration of  
40 ComM foci within cells of each class were analyzed as indicated above and plotted.

41

1 To assess ssDNA vs dsDNA integration, we performed time-lapse microscopy. Only cells that  
2 initially contained one genome (i.e. started with only a single *parS2* site) and formed a de novo  
3 *parS1* site during the time lapse were analyzed. Cells that generated predivisional cells with  
4 both a ParB1 and ParB2 focus were scored as having undergone 'ssDNA integration', while  
5 those that formed two ParB1 foci were scored as having undergone 'dsDNA integration'.  
6

7 The time required for expression of tDNA-derived GFP following chromosome replication was  
8 determined by time-lapse microscopy. The integration of tDNA resulted in ablation of the *parS1*  
9 site and corresponding ParB1 focus. However, upon chromosome replication, the *parS1* site is  
10 restored and cells reform the corresponding ParB1 focus (as shown in **Fig. 4B**). Thus, the  
11 reappearance of the ParB1 focus was used to demarcate chromosome replication. The time  
12 required for tDNA expression was then defined as the first frame following chromosome  
13 replication in which GFP expression was evident. Occasionally, cells expressed GFP without  
14 reappearance of the ParB1 focus, which likely represented events where dsDNA integration had  
15 occurred. We could not demarcate *gfp* expression relative to chromosome replication reliably in  
16 these events; therefore, these cells were excluded from the analysis.  
17

18 Epigenetic inheritance of antibiotic resistance was tracked via time-lapse microscopy. Cells  
19 containing a chromosomally inactivated *gfp* allele ( $P_{tac}\text{-}gfp^*::parS1$ ) were transformed with DNA  
20 that would repair the *gfp* gene and contained a linked Ab<sup>R</sup> marker and *parS2* site. The order of  
21 these 3 markers on the tDNA was *parS2*-Ab<sup>R</sup>- $P_{tac}\text{-}gfp$ . This order was critical because the first  
22 and last markers (*parS2* and  $P_{tac}\text{-}gfp$ ) could be visually tracked by formation of a ParB2 focus  
23 and GFP expression, respectively. So, if cells received the first and last markers, it was  
24 assumed that they would also have integrated the intervening Ab<sup>R</sup> marker. Thus, only cells that  
25 received both the first and last markers were analyzed for epigenetic antibiotic inheritance. In  
26 this assay, cells were first incubated with tDNA for 3 hours in instant ocean medium and were  
27 then placed under an 0.2% gelzan pad made in M9 minimal medium supplemented with 1%  
28 glucose and the appropriate antibiotic (kanamycin 100 µg/mL, erythromycin 10 µg/mL, or  
29 chloramphenicol 2 µg/mL as indicated). Cells were imaged every 5-10 mins for up to 12 hours.  
30

### 31 32 *Natural transformation / antibiotic challenge assays*

33 For a schema of the experimental procedure see **Fig. S4A-B**. For experiments with *V. cholerae*,  
34 cells were grown overnight in LB supplemented with 100 µg/mL IPTG. Then, ~10<sup>8</sup> cells were  
35 washed, resuspended, and diluted into instant ocean medium. Next, ~3 µg of tDNA (Kan<sup>R</sup> or  
36 Spec<sup>R</sup> as appropriate) was added to reactions, while nothing was added to the 'no DNA' control  
37 reactions. Reactions were incubated at 30°C for 5 hours to allow for DNA integration. DNAase I  
38 (NEB) was then added to reactions to eliminate all remaining extracellular DNA. Next, reactions  
39 were diluted into LB medium and outgrown for the indicated amount of time (0 min – 240 min).  
40 Following outgrowth, cells were washed twice and resuspended in instant ocean medium. Next,  
41 reactions were challenged with a high dose of antibiotic (kanamycin 1000 µg/mL or  
42 spectinomycin 10,000 µg/mL as appropriate) for 3 hours to kill all susceptible cells. Cells were

1 then washed twice, resuspended in instant ocean medium, and plated for quantitative culture as  
2 indicated to determine the number of transformants, non-transformants, and illegitimate  
3 recombinants that survived the antibiotic treatment.

4  
5 For experiments with *S. pneumoniae*, cells were grown overnight on blood agar plates. The  
6 following day, cells were suspended off of these plates with CAT+GP and diluted into 10 mL of  
7 CAT+GP and grown statically at 37°C for 3-4 hours. Then, ~1mL transformation reactions were  
8 prepared with the following: 100 µL CAT+GP, 50 µL 20 mM CaCl<sub>2</sub>, 2.5 µL 250 µg/mL CSP, and  
9 850 µL of cells adjusted to an OD<sub>600</sub> = 0.05. Next, ~900 ng of tDNA ( $\Delta nanB::Kan^R$ ) was added to  
10 '+DNA' reactions, while nothing was added to the 'NO DNA' reactions. Transformation reactions  
11 were incubated at 37°C statically for 30 min to allow for DNA integration. Then, DNase I was  
12 added to reactions to digest any uningested DNA. Reactions were incubated at 37°C statically  
13 for an additional 30 min. Reactions were then outgrown in CAT+GP medium for the indicated  
14 amount of time (0 min - 360 min). Following outgrowth, cells were washed once and  
15 resuspended in instant ocean medium containing kanamycin at a final concentration of 10,000  
16 µg/mL. Reactions were incubated at 37°C statically for 3.5 hours to kill susceptible cells. Cells  
17 were then pelleted, washed twice, resuspended in instant ocean medium, and plated for  
18 quantitative culture as indicated to determine the number of transformants (Kan<sup>R</sup> CFUs), non-  
19 transformants (Erm<sup>R</sup> CFUs), and illegitimate recombinants (Kan<sup>R</sup>+Erm<sup>R</sup> CFUs) that survived the  
20 kanamycin treatment.

## 21 22 **References**

- 23 Babic, A., Lindner, A.B., Vulic, M., Stewart, E.J., and Radman, M. (2008). Direct visualization of  
24 horizontal gene transfer. *Science* 319, 1533-1536.
- 25 Berge, M., Mortier-Barriere, I., Martin, B., and Claverys, J.P. (2003). Transformation of  
26 *Streptococcus pneumoniae* relies on DprA- and RecA-dependent protection of incoming DNA  
27 single strands. *Mol Microbiol* 50, 527-536.
- 28 Blokesch, M. (2016). Natural competence for transformation. *Curr Biol* 26, R1126-R1130.
- 29 Boonstra, M., Vesel, N., and Kuipers, O.P. (2018). Fluorescently Labeled DNA Interacts with  
30 Competence and Recombination Proteins and Is Integrated and Expressed Following Natural  
31 Transformation of *Bacillus subtilis*. *MBio* 9, e01161-01118.
- 32 Corbinais, C., Mathieu, A., Kortulewski, T., Radicella, J.P., and Marsin, S. (2016). Following  
33 transforming DNA in *Helicobacter pylori* from uptake to expression. *Mol Microbiol* 101, 1039-  
34 1053.
- 35 Dalia, A.B. (2018). Natural Cotransformation and Multiplex Genome Editing by Natural  
36 Transformation (MuGENT) of *Vibrio cholerae*. *Methods Mol Biol* 1839, 53-64.
- 37 Dalia, A.B., McDonough, E., and Camilli, A. (2014). Multiplex genome editing by natural  
38 transformation. *Proc Natl Acad Sci U S A* 111, 8937-8942.

- 1 Dalia, T.N., Yoon, S.H., Galli, E., Barre, F.X., Waters, C.M., and Dalia, A.B. (2017). Enhancing  
2 multiplex genome editing by natural transformation (MuGENT) via inactivation of ssDNA  
3 exonucleases. *Nucleic Acids Res* 45, 7527-7537.
- 4 David, A., Demarre, G., Muresan, L., Paly, E., Barre, F.X., and Possoz, C. (2014). The two Cis-  
5 acting sites, parS1 and oriC1, contribute to the longitudinal organisation of *Vibrio cholerae*  
6 chromosome I. *PLoS Genet* 10, e1004448.
- 7 Dubnau, D., and Davidoff-Abelson, R. (1971). Fate of transforming DNA following uptake by  
8 competent *Bacillus subtilis*. I. Formation and properties of the donor-recipient complex. *J Mol*  
9 *Biol* 56, 209-221.
- 10 Ducret, A., Quardokus, E.M., and Brun, Y.V. (2016). MicrobeJ, a tool for high throughput  
11 bacterial cell detection and quantitative analysis. *Nat Microbiol* 1, 16077.
- 12 Ellison, C.K., Dalia, T.N., Vidal Ceballos, A., Wang, J.C., Biais, N., Brun, Y.V., and Dalia, A.B.  
13 (2018). Retraction of DNA-bound type IV competence pili initiates DNA uptake during natural  
14 transformation in *Vibrio cholerae*. *Nat Microbiol* 3, 773-780.
- 15 Fogel, M.A., and Waldor, M.K. (2006). A dynamic, mitotic-like mechanism for bacterial  
16 chromosome segregation. *Genes Dev* 20, 3269-3282.
- 17 Fox, M.S., and Allen, M.K. (1964). On the Mechanism of Deoxyribonucleate Integration in  
18 Pneumococcal Transformation. *Proc Natl Acad Sci U S A* 52, 412-419.
- 19 Gabor, M., and Hotchkiss, R.D. (1966). Manifestation of linear organization in molecules of  
20 pneumococcal transforming DNA. *Proc Natl Acad Sci U S A* 56, 1441-1448.
- 21 Griffith, F. (1928). The Significance of Pneumococcal Types. *J Hyg (Lond)* 27, 113-159.
- 22 Johnsen, P.J., Dubnau, D., and Levin, B.R. (2009). Episodic selection and the maintenance of  
23 competence and natural transformation in *Bacillus subtilis*. *Genetics* 181, 1521-1533.
- 24 Kidane, D., and Graumann, P.L. (2005). Intracellular protein and DNA dynamics in competent  
25 *Bacillus subtilis* cells. *Cell* 122, 73-84.
- 26 Kowalczykowski, S.C., Dixon, D.A., Eggleston, A.K., Lauder, S.D., and Rehrauer, W.M. (1994).  
27 Biochemistry of homologous recombination in *Escherichia coli*. *Microbiol Rev* 58, 401-465.
- 28 Lacks, S. (1962). Molecular fate of DNA in genetic transformation of *Pneumococcus*. *J Mol Biol*  
29 5, 119-131.
- 30 Lorenz, M.G., and Wackernagel, W. (1994). Bacterial gene transfer by natural genetic  
31 transformation in the environment. *Microbiol Rev* 58, 563-602.



- 1 Marie, L., Rapisarda, C., Morales, V., Berge, M., Perry, T., Soulet, A.L., Gruget, C., Remaut, H.,  
2 Fronzes, R., and Polard, P. (2017). Bacterial RadA is a DnaB-type helicase interacting with  
3 RecA to promote bidirectional D-loop extension. *Nat Commun* 8, 15638.
- 4 Megerle, J.A., Fritz, G., Gerland, U., Jung, K., and Radler, J.O. (2008). Timing and dynamics of  
5 single cell gene expression in the arabinose utilization system. *Biophys J* 95, 2103-2115.
- 6 Mejean, V., and Claverys, J.P. (1984). Use of a cloned DNA fragment to analyze the fate of  
7 donor DNA in transformation of *Streptococcus pneumoniae*. *J Bacteriol* 158, 1175-1178.
- 8 Miller, V.L., DiRita, V.J., and Mekalanos, J.J. (1989). Identification of *toxS*, a regulatory gene  
9 whose product enhances *toxR*-mediated activation of the cholera toxin promoter. *J Bacteriol*  
10 171, 1288-1293.
- 11 Moradigaravand, D., and Engelstadter, J. (2013). The evolution of natural competence:  
12 disentangling costs and benefits of sex in bacteria. *Am Nat* 182, E112-126.
- 13 Mortier-Barriere, I., Velten, M., Dupaigne, P., Mirouze, N., Pietrement, O., McGovern, S.,  
14 Fichant, G., Martin, B., Noirot, P., Le Cam, E., *et al.* (2007). A key presynaptic role in  
15 transformation for a widespread bacterial protein: DprA conveys incoming ssDNA to RecA. *Cell*  
16 130, 824-836.
- 17 Nero, T.M., Dalia, T.N., Wang, J.C., Kysela, D.T., Bochman, M.L., and Dalia, A.B. (2018).  
18 ComM is a hexameric helicase that promotes branch migration during natural transformation in  
19 diverse Gram-negative species. *Nucleic Acids Res* 46, 6099-6111.
- 20 Nester, E.W., Schafer, M., and Lederberg, J. (1963). Gene Linkage in DNA Transfer: A Cluster  
21 of Genes Concerned with Aromatic Biosynthesis in *Bacillus Subtilis*. *Genetics* 48, 529-551.
- 22 Nielsen, H.J., Ottesen, J.R., Youngren, B., Austin, S.J., and Hansen, F.G. (2006). The  
23 *Escherichia coli* chromosome is organized with the left and right chromosome arms in separate  
24 cell halves. *Mol Microbiol* 62, 331-338.
- 25 Piechowska, M., and Fox, M.S. (1971). Fate of transforming deoxyribonucleate in *Bacillus*  
26 *subtilis*. *J Bacteriol* 108, 680-689.
- 27 Pillet, F., Sanchez, A., Lane, D., Anton Leberre, V., and Bouet, J.Y. (2011). Centromere binding  
28 specificity in assembly of the F plasmid partition complex. *Nucleic Acids Res* 39, 7477-7486.
- 29 Redfield, R.J. (1988). Evolution of bacterial transformation: is sex with dead cells ever better  
30 than no sex at all? *Genetics* 119, 213-221.
- 31 Seitz, P., and Blokesch, M. (2014). DNA transport across the outer and inner membranes of  
32 naturally transformable *Vibrio cholerae* is spatially but not temporally coupled. *MBio* 5, e01409-  
33 01414.

- 1 van der Ende, A., Teertstra, R., van der Avoort, H.G., and Weisbeek, P.J. (1983). Initiation  
2 signals for complementary strand DNA synthesis on single-stranded plasmid DNA. *Nucleic  
3 Acids Res* 11, 4957-4975.
- 4 Veening, J.W., Smits, W.K., and Kuipers, O.P. (2008). Bistability, epigenetics, and bet-hedging  
5 in bacteria. *Annu Rev Microbiol* 62, 193-210.
- 6 Weng, L., Biswas, I., and Morrison, D.A. (2009). A self-deleting Cre-lox-ermAM cassette,  
7 Cheshire, for marker-less gene deletion in *Streptococcus pneumoniae*. *J Microbiol Methods* 79,  
8 353-357.
- 9 Willetts, N., and Wilkins, B. (1984). Processing of plasmid DNA during bacterial conjugation.  
10 *Microbiol Rev* 48, 24-41.
- 11 Wylie, C.S., Trout, A.D., Kessler, D.A., and Levine, H. (2010). Optimal strategy for competence  
12 differentiation in bacteria. *PLoS Genet* 6, e1001108.
- 13

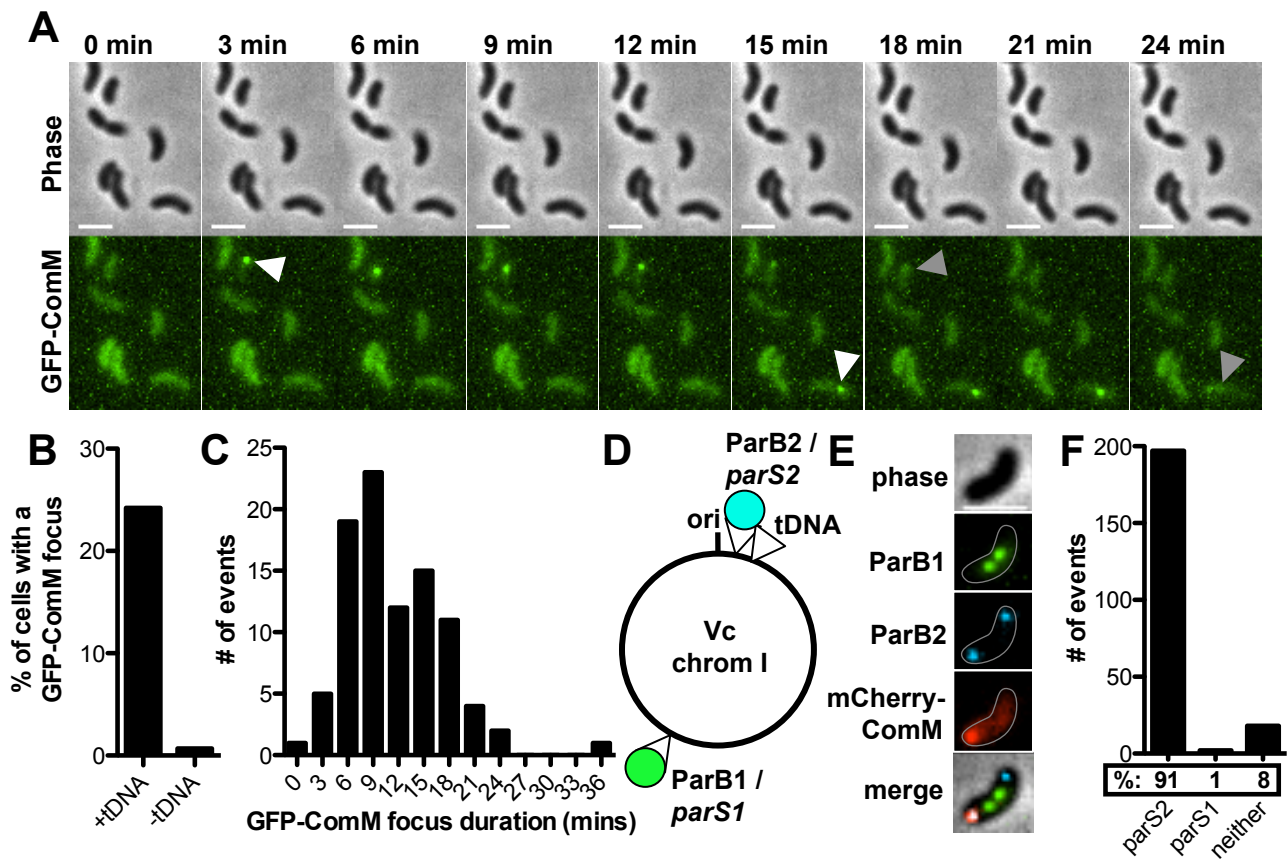

**Fig. 1 – ComM fluorescent fusions serve as a marker for homologous recombination during NT. (A)** Montage of timelapse imaging of a constitutively competent strain expressing GFP-ComM incubated with tDNA. White arrows indicate the appearance of GFP-ComM foci, while gray arrows indicate their disappearance. Scale bar, 2 $\mu$ m. **(B)** The percentage of cells that form a ComM focus when cells were imaged in the presence or absence of tDNA. Experiments were imaged every 1 min for 45 mins. Data are from three independent experiments and the mean is reported; n = 1315 cells for +tDNA and n = 1143 for -tDNA samples. **(C)** The duration of GFP-ComM foci from cells incubated with tDNA. n = 110 foci analyzed. **(D)** Schematic for the experimental setup to test whether ComM foci mark the site of homologous recombination. Cells constitutively expressed yGFP-ParB1/CFP-ParB2, contained a *parS2* site proximal to the origin, a *parS1* site proximal to the terminus, and expressed mCherry-ComM. Cells were incubated with tDNA that should integrate proximal to the *parS2* site. **(E)** Static image of a predivisive cell showing that the mCherry-ComM focus colocalizes with the proximally located *parS2* site. Scale bar, 2 $\mu$ m. **(F)** Quantifying colocalization of mCherry-ComM foci with the indicated *parS* site (i.e. ParB focus) when incubated with tDNA that integrates proximal to the *parS2* site. Data are from two independent experiments; n = 217 ComM foci analyzed.

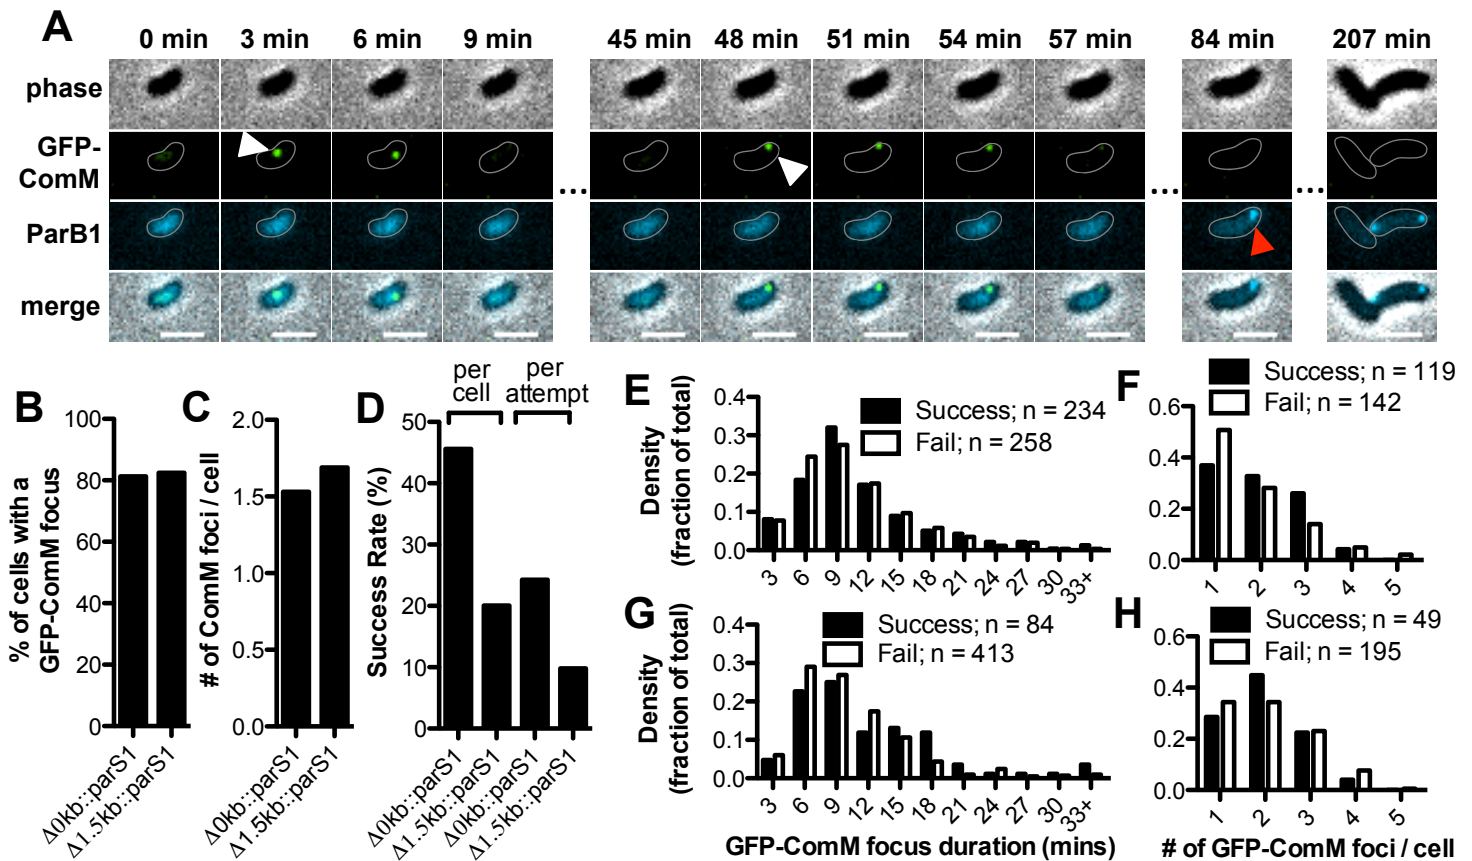

**Fig. 2 – Quantifying the efficacy of homologous recombination during NT.** Success rates for homologous recombination were determined using a cell biological approach where cells expressed GFP-ComM and CyPet-ParB1, but initially lacked a *parS1* site. These cells were then incubated with tDNA that would simply integrate a *parS1* site into the genome (i.e.  $\Delta 0\text{kb}::\text{parS1}$ ) or delete and replace a 1.5 kb marker with a *parS1* site (i.e.  $\Delta 1.5\text{kb}::\text{parS1}$ ). **(A)** Montage of timelapse imaging of one representative example of successful tDNA integration for  $\Delta 0\text{kb}::\text{parS1}$ . White arrows show when the cell forms ComM foci indicating an attempt at tDNA integration, while red arrows show when the cell forms a CyPet-ParB1 focus, which indicates successful tDNA integration into the genome. Experiments were imaged every 3 min for 5 hours. **(B)** The percentage of cells that formed at least one ComM focus and **(C)** the number of ComM foci per cell.  $n = 320$  for  $\Delta 0\text{kb}::\text{parS1}$  and  $n = 296$  for  $\Delta 1.5\text{kb}::\text{parS1}$ . **(D)** The success rate for tDNA integration was calculated on a per cell basis (i.e. the percentage of cells that formed ComM foci, which ultimately succeeded to integrate tDNA) or a per attempt basis (i.e. assuming that only one ComM focus is required for integration, the success rate per attempt is the percentage of ComM foci that resulted in successful tDNA integration).  $n = 261$  cells with  $\geq 1$  ComM focus analyzed for  $\Delta 0\text{kb}::\text{parS1}$  and  $n = 244$  for  $\Delta 1.5\text{kb}::\text{parS1}$ . Histograms showing ComM focus duration in cells that ultimately succeeded vs failed to integrate tDNA for **(E)**  $0\text{kb}::\text{parS1}$  and **(G)**  $\Delta 1.5\text{kb}::\text{parS1}$ . Histograms showing the number of ComM foci in cells that succeeded vs failed to integrate tDNA for **(F)**  $0\text{kb}::\text{parS1}$  and **(H)**  $\Delta 1.5\text{kb}::\text{parS1}$ .

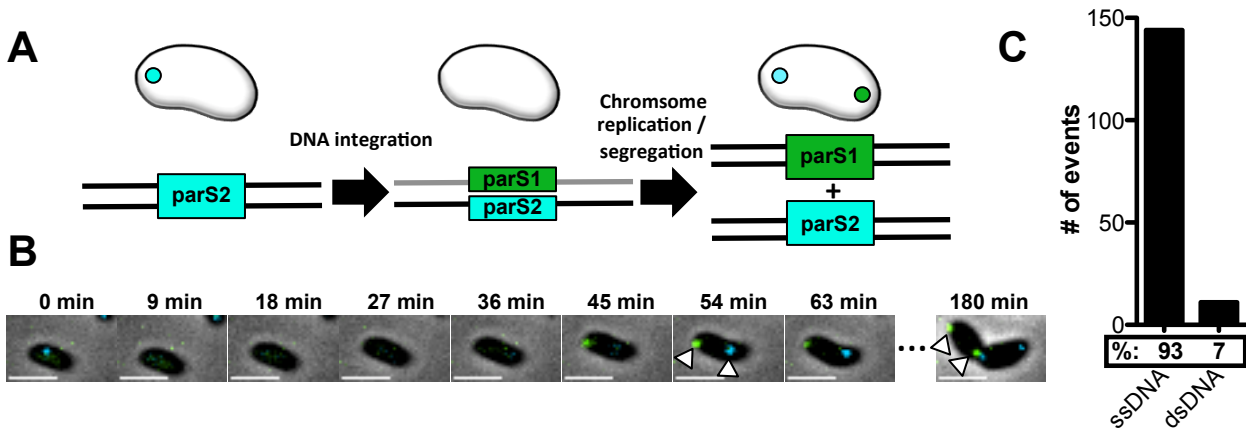

**Fig. 3 - Integration of single-stranded tDNA during NT forms heteroduplexes that are resolved by chromosome replication and segregation.** (A) Schematic of the experimental setup and expected results if tDNA is integrated as ssDNA during NT. Cells constitutively expressed yGFP-ParB1/CFP-ParB2 and contained a *parS2* site (cyan ParB2) in the genome. Cells were then transformed with tDNA that would replace the *parS2* site with a *parS1* site (green ParB1). Experiments were imaged every 3 min for 5 hours. (B) Montage of timelapse imaging for one representative example of ssDNA integration. Arrows indicate a predivisional cell with both yGFP-ParB1 and CFP-ParB2 foci, which indicates that the DNA that was integrated during NT was single-stranded and the resulting heteroduplex was resolved by chromosome replication and segregation. Consistent with these new foci representing a resolved heteroduplex, each *parS* site is faithfully replicated in the next round of chromosome replication (arrows at 180 min). Scale bars, 2 $\mu$ m. (C) Quantification of the number of cells that exhibit ssDNA integration (as indicated in B) vs dsDNA integration (as indicated in Fig. S3). Data are from three independent experiments; n = 155 cells with integrated tDNA analyzed.

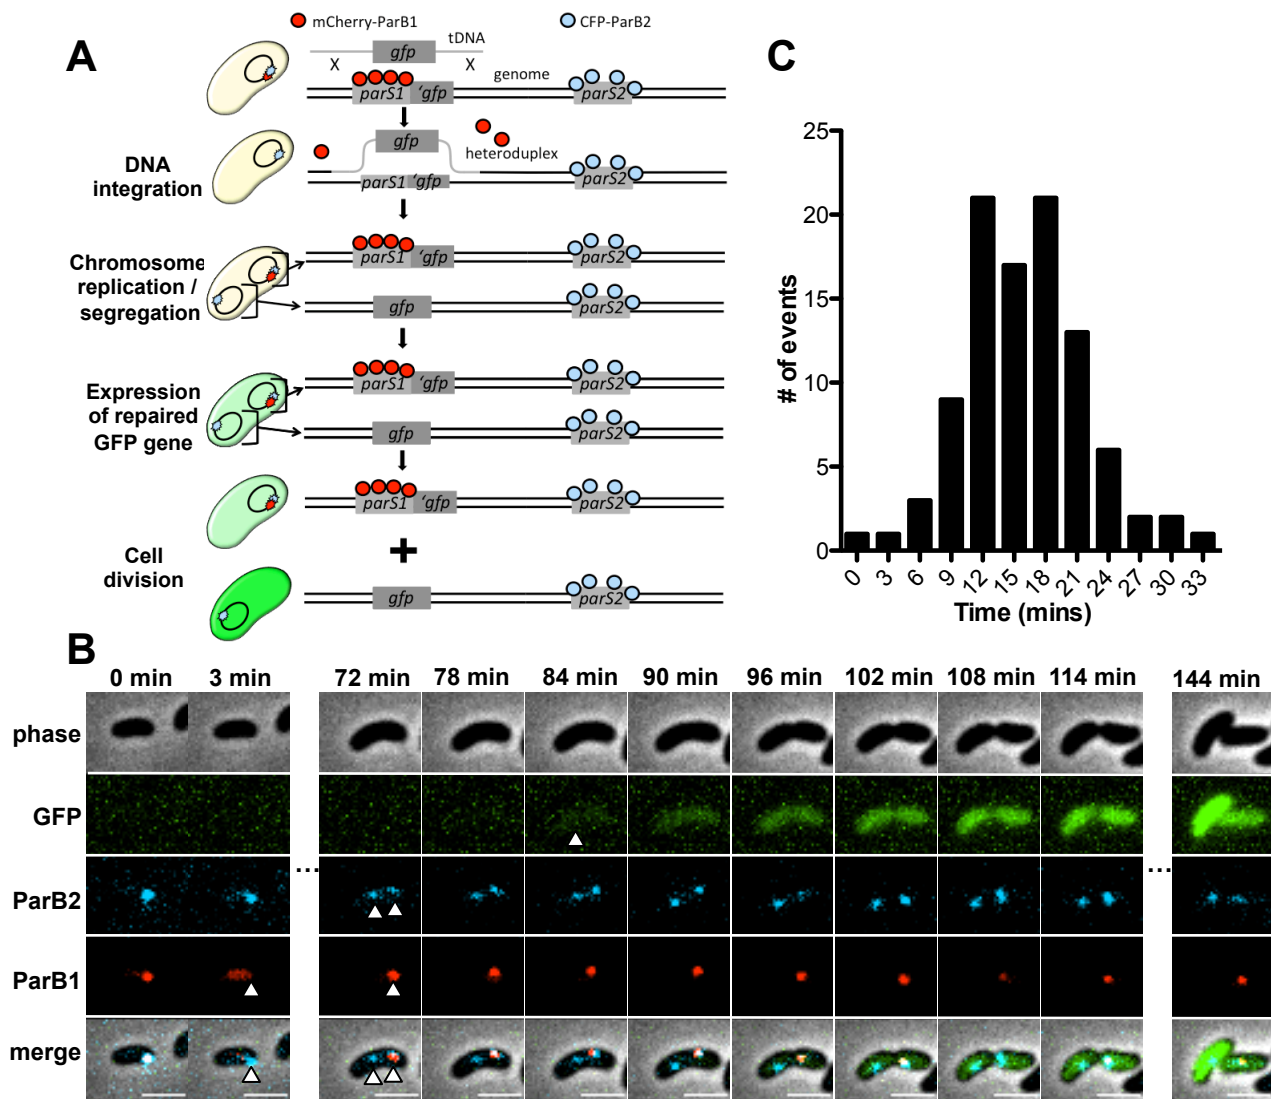

**Fig. 4 – Natural transformation promotes epigenetic inheritance of tDNA-derived gene products. (A)** Schema of the experimental setup. Cells contained *parS1* (red ParB1) and *parS2* (cyan ParB2) sites in close proximity on the chromosome. The *parS1* site interrupts a chromosomally integrated *gfp* gene. Cells were then transformed with tDNA to delete the *parS1* site and restore the *gfp* gene. Experiments were imaged every 3 mins for 5 hours. **(B)** Montage of time lapse imaging of one representative cell that successfully integrates tDNA. Cells first integrate DNA (as indicated by loss of the ParB1 focus at 3 min), then chromosome replication and segregation occurs to resolve the heteroduplex (as indicated by splitting of the ParB2 focus and reappearance of the ParB1 focus in one genome at 72 min), and finally GFP is rapidly expressed following chromosome replication (84 min timepoint) and inherited by both daughter cells, including the cell that is genotypically still a GFP mutant (i.e. the cell containing the ParB1 focus). Scale bar, 2  $\mu$ m. **(C)** Histogram of the time delay to tDNA-derived GFP expression following chromosome replication. Data are from three independent experiments and  $n = 97$  GFP positive cells analyzed.

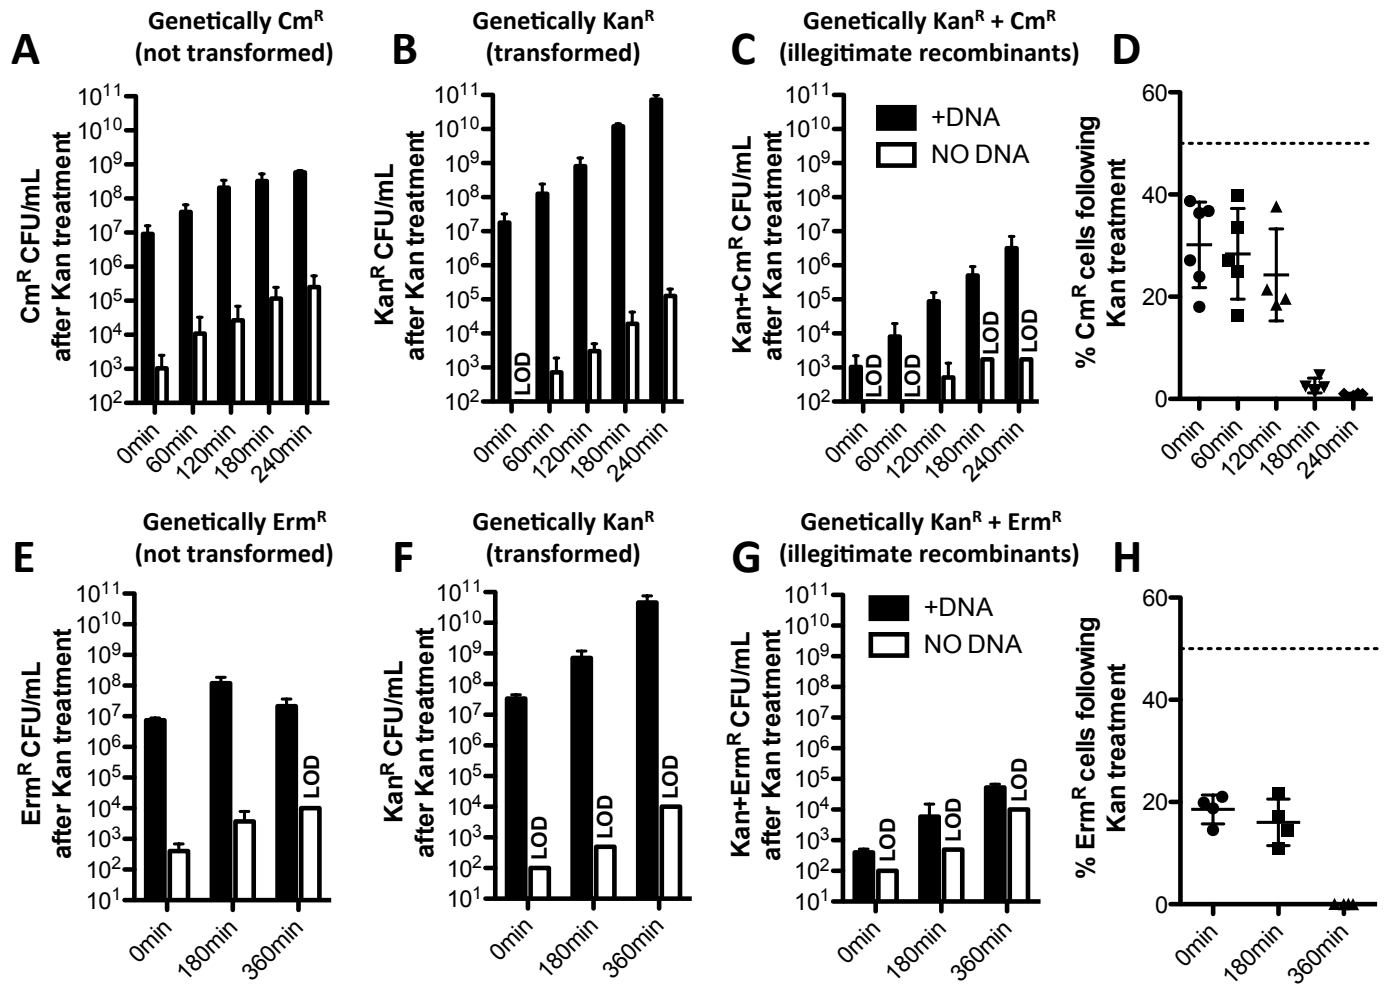

**Fig. 5 – NT confers transgenerational epigenetic inheritance of antibiotic resistance in *V. cholerae* and *S. pneumoniae*.** Transgenerational epigenetic inheritance of antibiotic resistance was assessed as schematized in Fig. S4A-B in (A-D) *V. cholerae* and (E-H) *S. pneumoniae*. In both cases, cells were transformed with Kan<sup>R</sup> tDNA and then outgrown for the amount of time indicated prior to a brief treatment with a high dose of kanamycin to kill susceptible cells. Cells were then washed and plated for quantitative culture on the media indicated to quantify the number of (A and E) non-transformants, (B and F) transformants, and (C and G) illegitimate recombinants that survived the kanamycin treatment. (D and H) Of the cells that survived the kanamycin treatment, the percentage of cells that were non-transformants was calculated from A-B and E-F and plotted. The dotted line at 50% represents the theoretical maximum value if every transformant conferred phenotypic kanamycin resistance to its untransformed sibling. All data are shown as the mean  $\pm$  SD and are from at least 4 independent biological replicates.

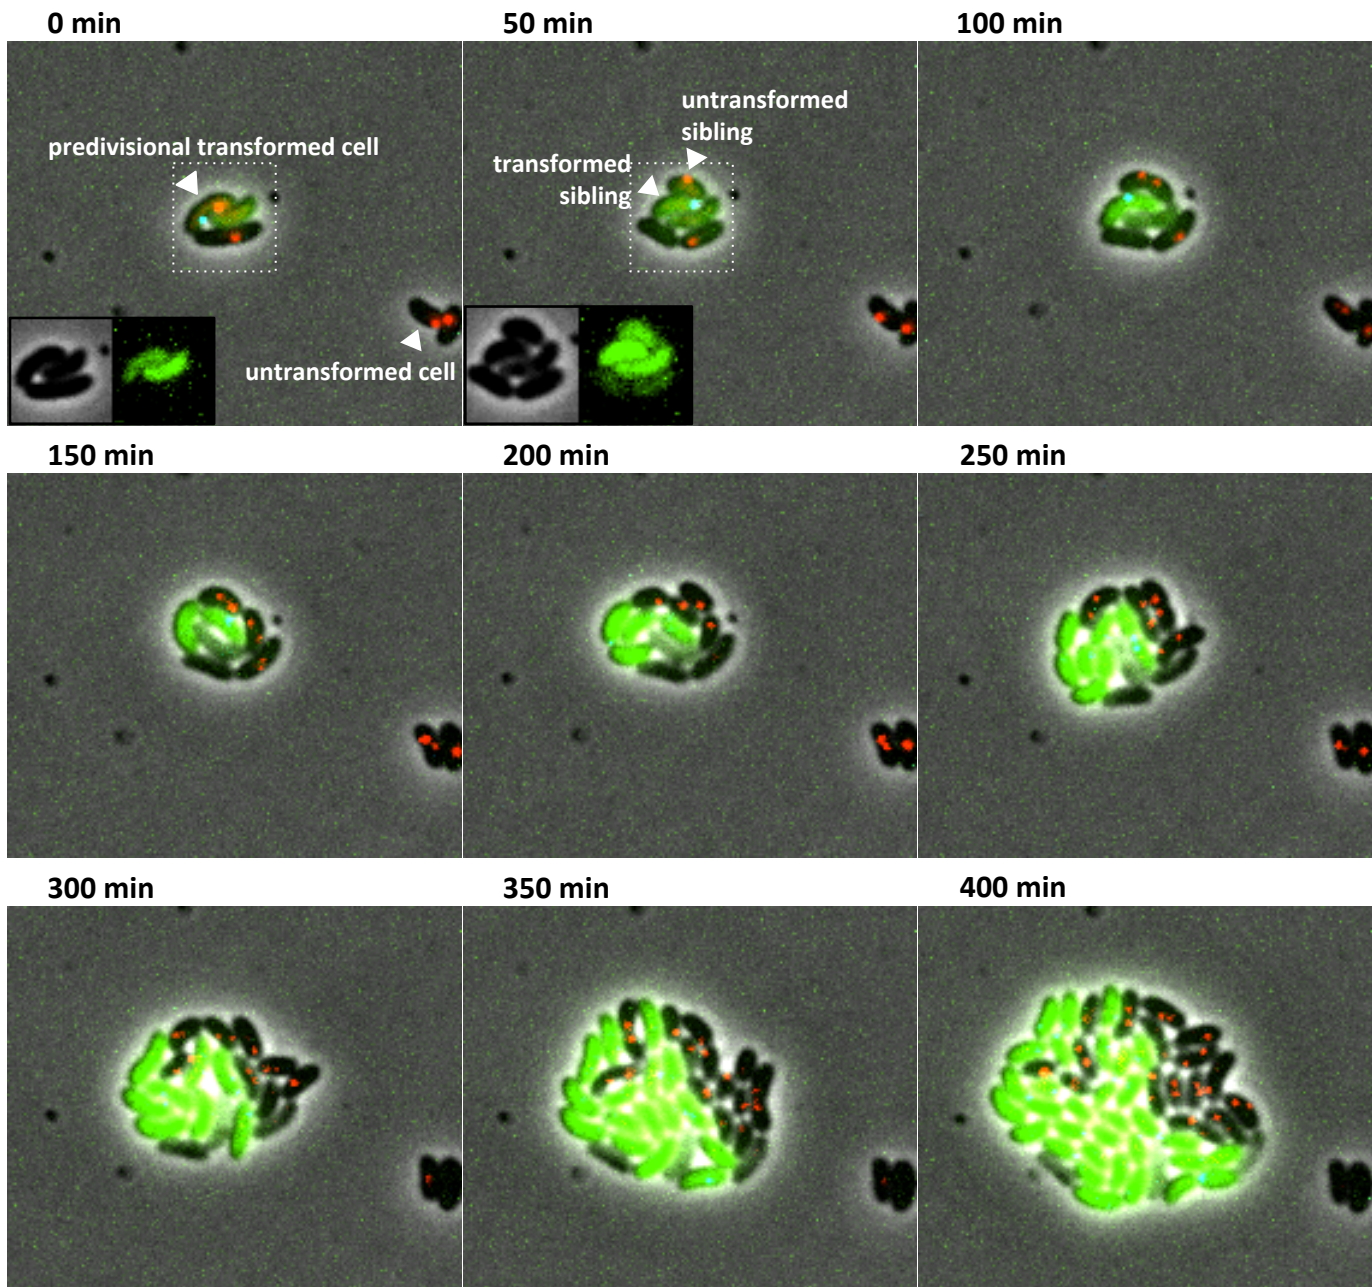

**Fig. 6 – Single cell assay to demonstrate transgenerational epigenetic inheritance of kanamycin resistance during NT.** For a detailed schema of the experimental setup see **Fig. S5A**. The parent strain constitutively expressed mCherry-ParB1 (red)/CFP-ParB2 (cyan) and contained a *parS1* site in the genome that disrupts a *gfp* gene. Cells were then incubated with tDNA that would remove the *parS1* site, restore the *gfp* gene, and integrate a *parS2* site linked to a Kan<sup>R</sup> marker. Thus, transformed cells (i.e. cells that actually integrated the tDNA), would express GFP (green), contain a CFP-ParB2 focus, lack an mCherry-ParB1 focus, and should express the Kan<sup>R</sup> gene product. While untransformed cells should represent the parent genotype and should not express GFP, contain an mCherry-ParB1 focus, lack a CFP-ParB2 focus, and should not express Kan<sup>R</sup>. Cells representing the parent genotype that were siblings of a transformed cell (i.e. the “untransformed sibling”), however, could epigenetically inherit the GFP and Kan<sup>R</sup> gene products. Montage of timelapse imaging of one representative predivisional transformed cell under an M9+glucose pad containing 100 µg/mL kanamycin is shown. Early timepoints indicate that the untransformed sibling inherits GFP that was expressed prior to cell division, which serves as a proxy for the Kan<sup>R</sup> gene product (see insets at 0 min and 50 min for images of just the GFP channel). As expected, the transformed sibling, which is genetically Kan<sup>R</sup>, grows well in the presence of kanamycin. Compared to the completely untransformed cell, which does not grow, the untransformed sibling (which is genetically Kan<sup>S</sup>) grows and divides for a number of generations in the presence of kanamycin, which indicates transgenerational epigenetic inheritance of the Kan<sup>R</sup> gene product. Experiments were imaged every 5 min for 10 hours.



## Supplementary Materials for

### Horizontal gene transfer by natural transformation promotes both genetic and epigenetic inheritance of traits

Ankur B. Dalia<sup>1,\*</sup> and Triana N. Dalia<sup>1</sup>

<sup>1</sup>Department of Biology, Indiana University, Bloomington, IN 47405.

\* Author for correspondence: [ankdalia@indiana.edu](mailto:ankdalia@indiana.edu)

#### **This PDF file includes:**

Figs. S1-S5  
Tables S1-S2  
Captions for Movies S1 to S5

#### **Other Supplementary Materials for this manuscript include the following:**

Movies S1-S5

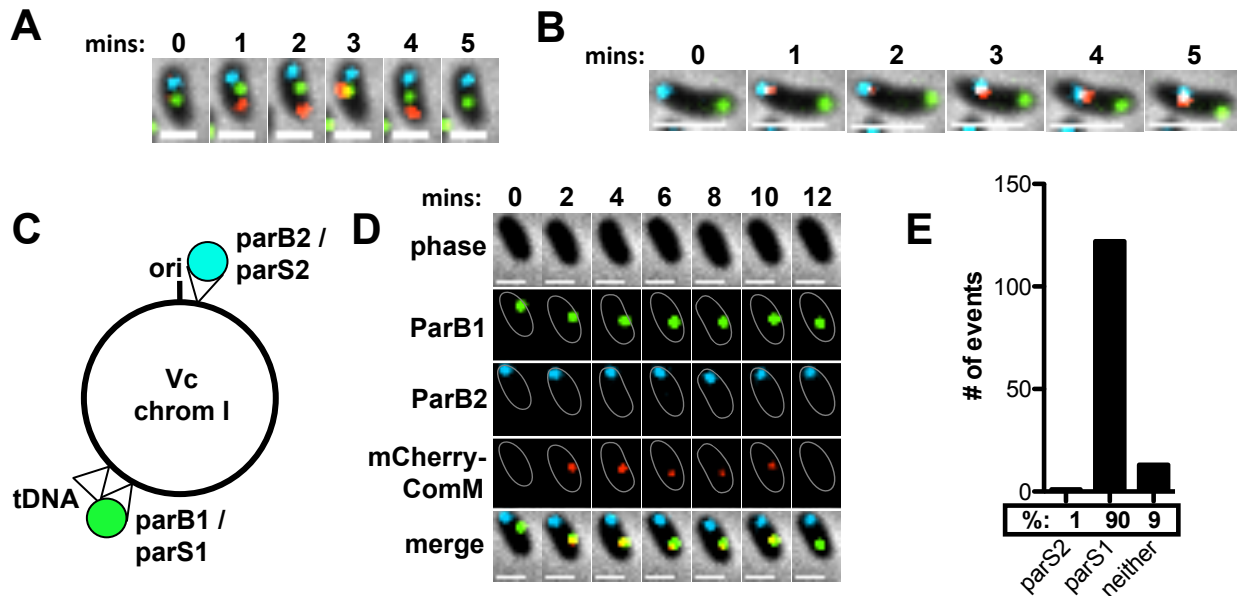

**Fig. S1 – ComM fluorescent fusions serve as a marker for homologous recombination during NT, Related to Figure 1.** (A and B) Montages of timelapse imaging. Cells constitutively expressed yGFP-ParB1/CFP-ParB2, contained a *parS2* site proximal to the origin, a *parS1* site proximal to the terminus, and expressed mCherry-ComM. Cells were incubated with tDNA that should integrate proximal to the *parS2* site (see Fig. 1D for a schematic). The montage in A shows a cell where the mCherry-ComM focus does not overlap with the *parS2* site. Scale bar, 1  $\mu$ m. The montage in B shows a cell where the mCherry-ComM focus displays colocalized movement with the *parS2* site. Scale bar, 2  $\mu$ m. (C) Schematic, (D) example montage of timelapse imaging, and (E) quantification of colocalization for an experiment where cells were transformed with tDNA that integrates proximal to the *parS1* site instead. Scale bar in D is 1  $\mu$ m. Data are from two independent experiments; n = 136 ComM foci analyzed.

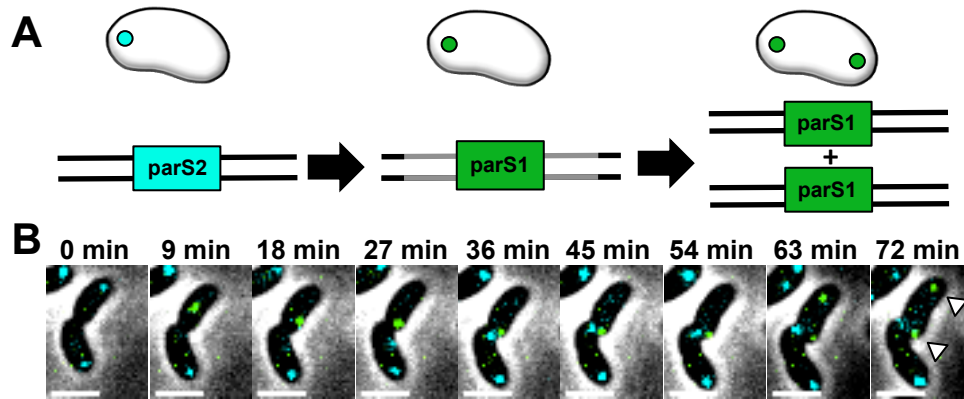

**Fig. S2 – Example of dsDNA integration during NT, Related to Figure 3.** Cells constitutively expressed yGFP-ParB1/CFP-ParB2 and contain a *parS2* site in the genome. Cells were then transformed with tDNA that would replace the *parS2* site with a *parS1* site. **(A)** Schematic to indicate the experimental setup and expected results for dsDNA integration. **(B)** Montage of timelapse imaging for dsDNA integration during NT. After integration, chromosome replication and segregation yields two yGFP-ParB1 foci (white arrows), which is consistent with dsDNA integration. Scale bar, 2 $\mu$ m.

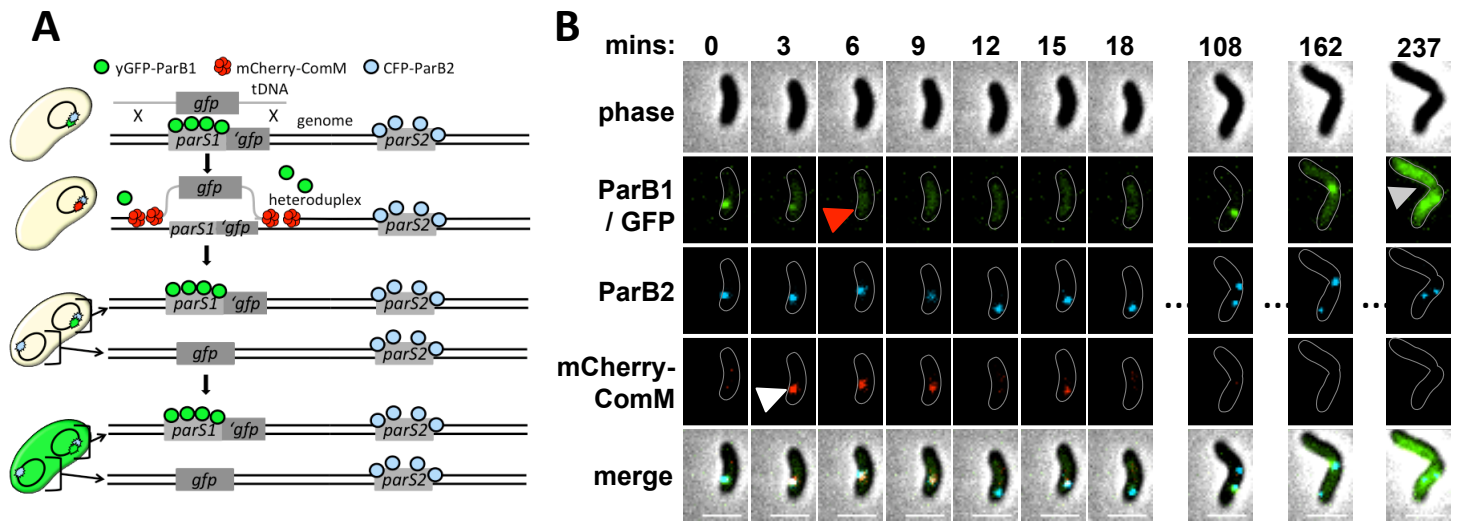

**Fig. S3 – Deletion of an established *parS* site provides a sensitive and immediate readout for tDNA integration in single cells, Related to Figure 2.** (A) Schematic indicating the experimental setup and proposed steps of tDNA integration. Cells constitutively expressed yGFP-ParB1 and CFP-ParB2, contained *parS1* and *parS2* sites in close proximity in the genome, and expressed mCherry-ComM. The *parS1* site disrupted a chromosomally integrated *gfp* gene. Cells were transformed with tDNA to delete the *parS1* site and restore the *gfp* gene. Experiments were imaged every 3 min for 5 hours. (B) Montage of timelapse imaging of a representative cell that successfully integrates the tDNA. Formation of a ComM focus (white arrow) immediately precedes tDNA integration, which is observed as the loss of the yGFP-ParB1 focus (red arrow). Successful DNA integration is also confirmed by elevated GFP expression (gray arrow). Scale bars, 2 $\mu$ m.

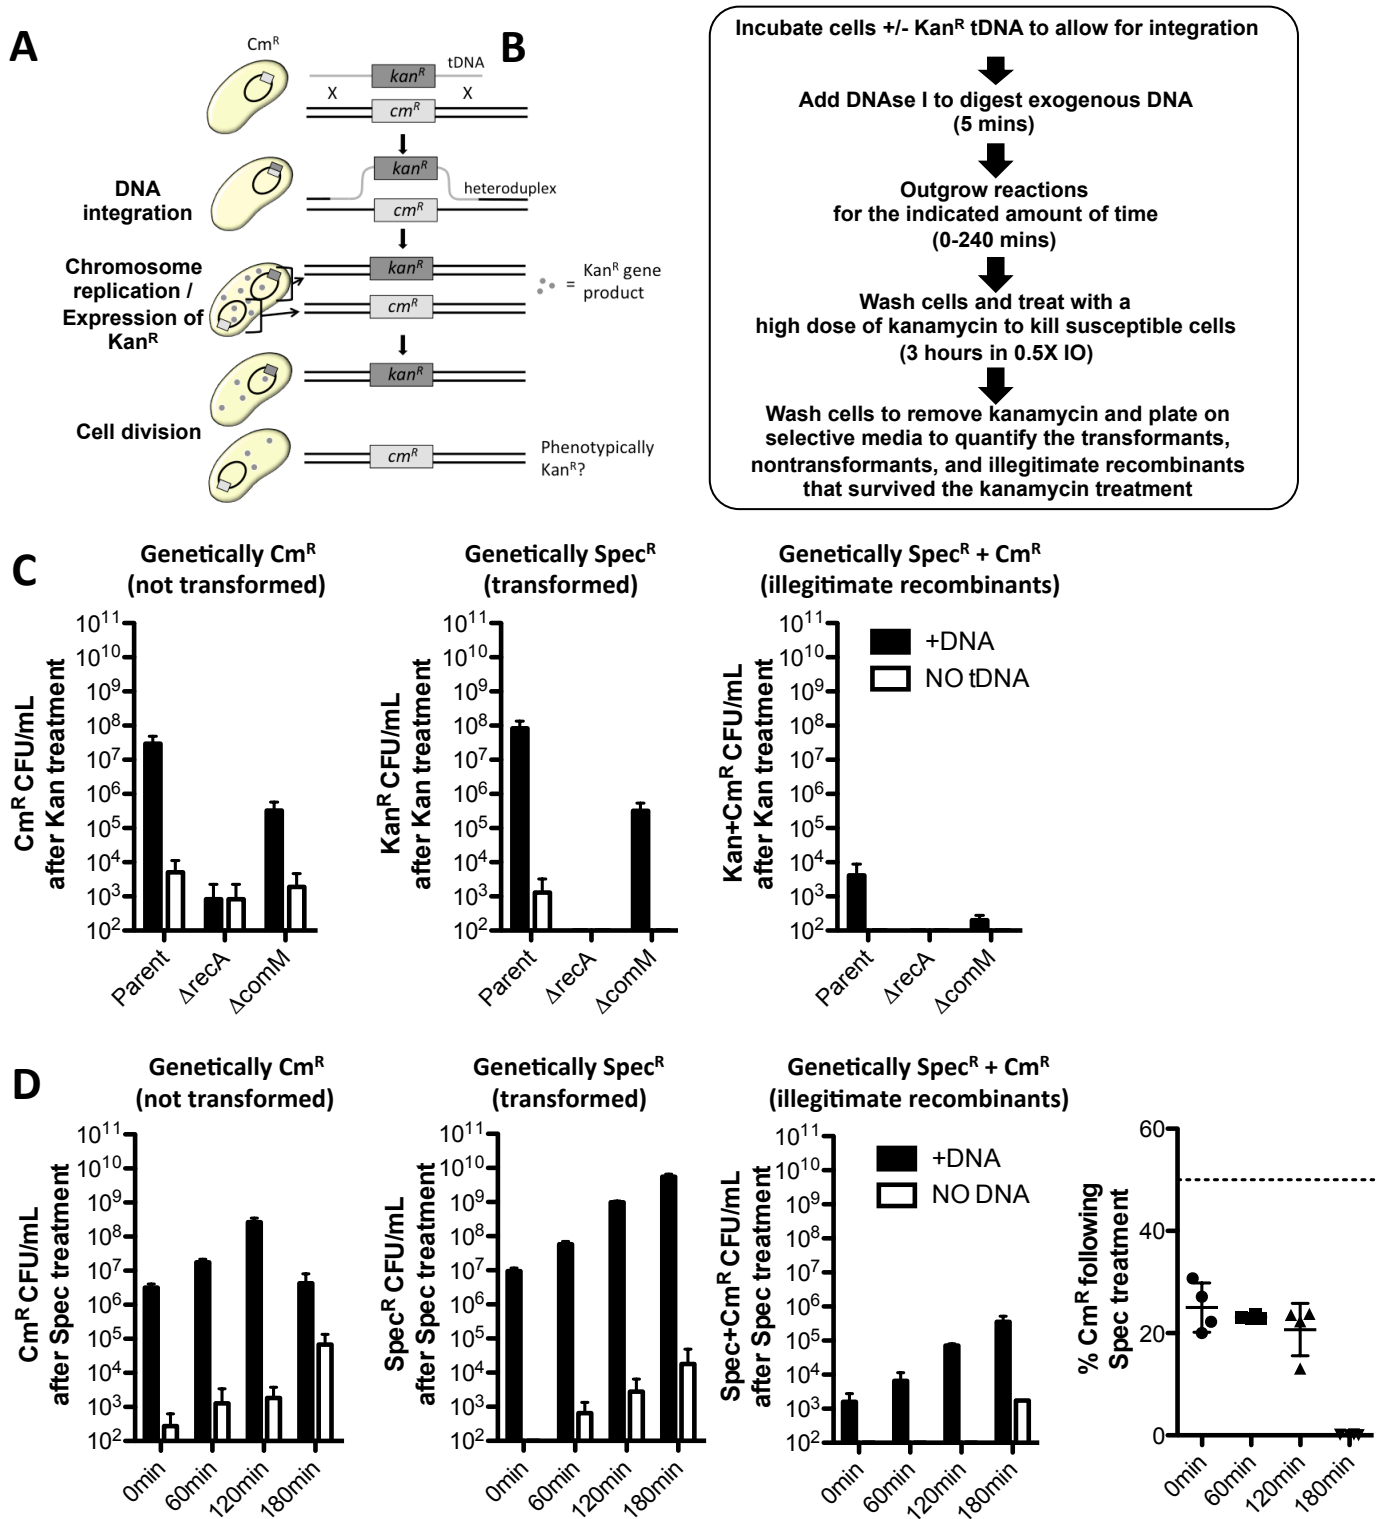

**Fig. S4 – Epigenetic inheritance of antibiotic resistance requires DNA integration and is relevant to other aminoglycosides, Related to Figure 5.** (A-B) Schema for testing transgenerational epigenetic inheritance of antibiotic resistance. (C) Epigenetic inheritance of Kan<sup>R</sup> was tested in the indicated mutant strains following 60 mins of outgrowth. (D) Epigenetic inheritance of antibiotic resistance was tested with Spec<sup>R</sup> tDNA. Cells were outgrown for the amount of time indicated on the X-axis prior to treatment with a lethal dose of spectinomycin to kill susceptible cells. All data are shown as the mean  $\pm$  SD and are from 4 independent experiments.

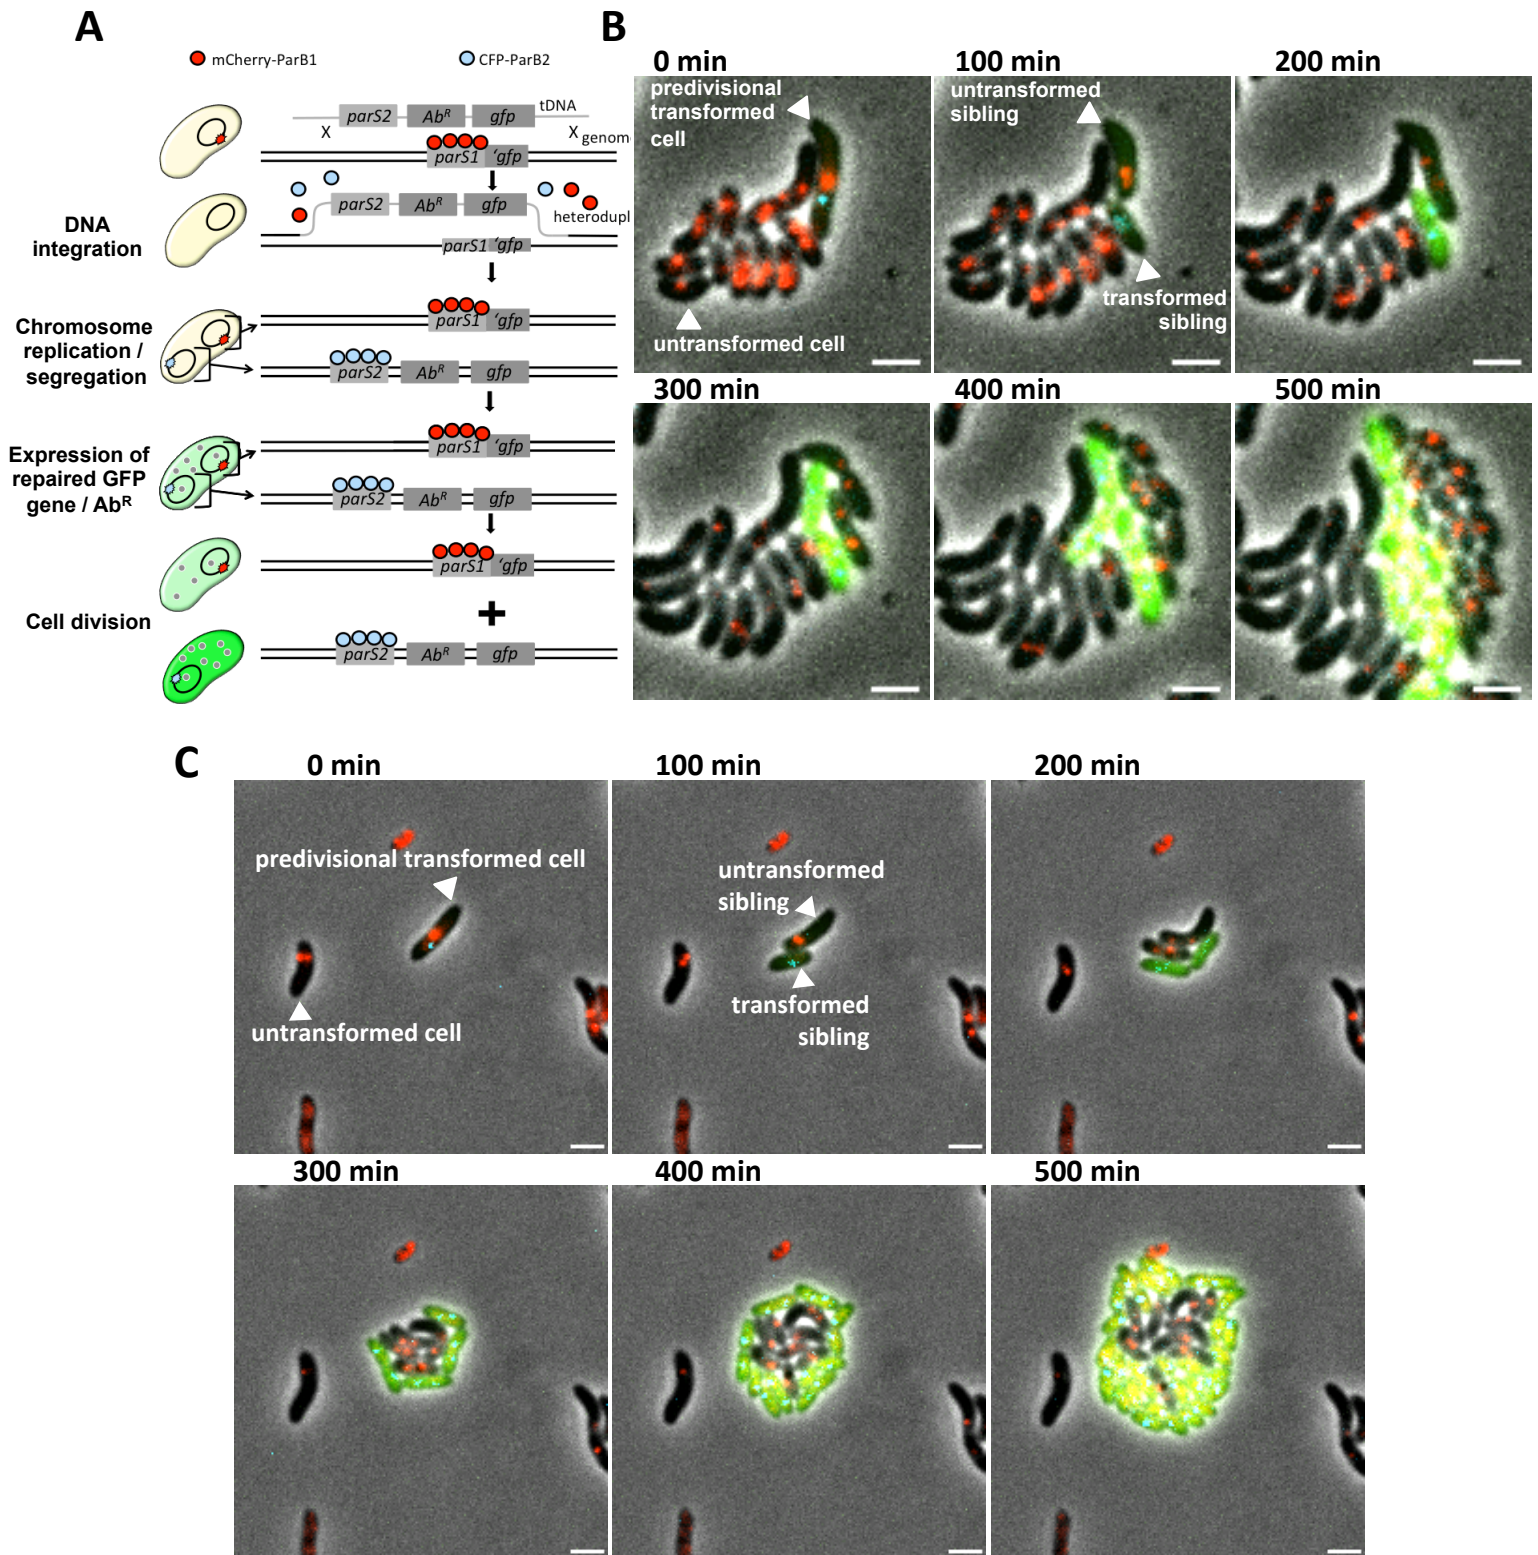

**Fig. S5 – Epigenetic inheritance during NT promotes transgenerational resistance to diverse classes of antibiotics, related to Figure 6.** (A) Schema of the experimental approach used to test epigenetic inheritance of antibiotic resistance as in Fig. 6 for kanamycin and here for (B) erythromycin and (C) chloramphenicol. Cells were transformed with Erm<sup>R</sup> and Cm<sup>R</sup> tDNA, respectively, and grown under pads containing the corresponding antibiotic (10 µg/mL erythromycin or 2 µg/mL chloramphenicol). Compared to ‘untransformed cells’, which do not grow, the ‘untransformed siblings’ (which are genetically Ab<sup>S</sup>) grow and divide for a number of generations in the presence of the antibiotic. This indicates that the untransformed sibling likely epigenetically inherited the Ab<sup>R</sup> gene product from its transformed sibling. Experiments were imaged every 10 min for 12 hours. Scale bars, 2 µm.

## Supplementary Tables

**Table S1 - Strains used in this study**

| <b>Strains used in the indicated Figures</b>                                                              |                                  |                                                                                                                                                                                                                                                                                               |                                |
|-----------------------------------------------------------------------------------------------------------|----------------------------------|-----------------------------------------------------------------------------------------------------------------------------------------------------------------------------------------------------------------------------------------------------------------------------------------------|--------------------------------|
| <b>Use</b>                                                                                                | <b>Relevant figure(s)</b>        | <b>Full genotype and antibiotic resistances</b>                                                                                                                                                                                                                                               | <b>Reference / (strain#)</b>   |
| Parent used to generate all of the <i>V. cholerae</i> strains for this study                              | N/A                              | E7946 Sm <sup>R</sup> , $\Delta lacZ::lacIq$ , $P_{tac-tfoX}$ , $\Delta luxO::Spec^R$ , <i>comEA-mCherry</i> , $\Delta VC1807::Kan^R$ , <i>pilA S67C</i>                                                                                                                                      | (Ellison et al., 2018)         |
| Tracking GFP-ComM foci                                                                                    | Fig. 1A-C                        | E7946 Sm <sup>R</sup> , $P_{tac-tfoX}$ , $\Delta luxO::Spec^R$ , <i>comEA-mCherry</i> , $\Delta VC1807::Cm^R$ , <i>pilA S67C</i> , 0.11 Mbp:: <i>parS<sub>MT1</sub></i> , <i>gfp-comM</i> , $\Delta lacZ::P_{lac-cyPet-parB_{MT1}}$ Zeo <sup>R</sup>                                          | This study / SAD1924           |
| Colocalizing mCherry-ComM and marked genomic loci                                                         | Fig. 1D-F, Fig. S1A-E            | E7946 Sm <sup>R</sup> , $P_{tac-tfoX}$ , $\Delta luxO$ , $\Delta VC1807::Cm^R$ , <i>pilA S67C</i> , <i>mCherry-comM</i> , 0.11 Mbp:: <i>parS<sub>P1</sub></i> , 1.963 Mbp:: <i>parS<sub>MT1</sub></i> , $\Delta lacZ::P_{lac-CFP-parB_{P1}}$ yGFP- <i>parB<sub>MT1}</sub> Zeo<sup>R</sup></i> | This study / TND1379 (SAD2440) |
| Quantifying success rates for integration of $\Delta 0kb::parS1$                                          | Fig. 2A-F                        | E7946 Sm <sup>R</sup> , $P_{tac-tfoX}$ , $\Delta luxO::Spec^R$ , <i>comEA-mCherry</i> , $\Delta VC1807::Kan^R$ , <i>pilA S67C</i> , <i>gfp-comM</i> , $\Delta lacZ::P_{lac-cyPet-parB_{MT1}}$ Zeo <sup>R</sup>                                                                                | This study / SAD1923           |
| Quantifying success rates for integration of $\Delta 1.5kb::parS1$                                        | Fig. 2B-H                        | E7946 Sm <sup>R</sup> , $P_{tac-tfoX}$ , $\Delta luxO::Spec^R$ , <i>comEA-mCherry</i> , $\Delta VC1807::Kan^R$ , <i>pilA S67C</i> , <i>gfp-comM</i> , $\Delta lacZ::P_{lac-cyPet-parB_{MT1}}$ Zeo <sup>R</sup> , 0.11 Mbp:: <i>Cm^R</i>                                                       | This study / TND1435 (SAD2441) |
| Quantifying ssDNA vs dsDNA integration                                                                    | Fig. 3A-C, Fig. S2, movie S1     | E7946 Sm <sup>R</sup> , $P_{tac-tfoX}$ , $\Delta luxO::Spec^R$ , <i>comEA-mCherry</i> , $\Delta VC1807::Cm^R$ , 0.11 Mbp:: <i>parS<sub>P1</sub></i> , <i>pilA S67C</i> , $\Delta lacZ::P_{lac-CFP-parB_{P1}}$ yGFP- <i>parB<sub>MT1}</sub> Zeo<sup>R</sup></i>                                | This study / SAD1950           |
| Colocalizing DNA integration and ComM foci                                                                | Fig. S3A-B                       | E7946 Sm <sup>R</sup> , $P_{tac-tfoX}$ , $\Delta luxO$ , <i>mCherry-comM</i> , 1.963 Mbp:: <i>parS<sub>P1</sub></i> , $\Delta VC1807::Cm^R-P_{tac-gfp*::parS_{MT1}}$ , <i>pilA S67C</i> , $\Delta lacZ::P_{lac-CFP-parB_{P1}}$ yGFP- <i>parB<sub>MT1}</sub> Zeo<sup>R</sup></i>               | This study / TND1307 (SAD2438) |
| Tracking epigenetic inheritance of GFP                                                                    | Fig. 4A-C, movie S2              | E7946 Sm <sup>R</sup> , $P_{tac-tfoX}$ , $\Delta luxO$ , <i>pilA S67C</i> , 1.963 Mbp:: <i>parS<sub>P1</sub></i> , $\Delta VC1807::Cm^R-P_{tac-gfp*::parS_{MT1}}$ , $\Delta lacZ::P_{lac-CFP-parB_{P1}}$ <i>mCherry-parB<sub>MT1}</sub> Zeo<sup>R</sup></i>                                   | This study / TND1338 (SAD2439) |
| Testing epigenetic inheritance of antibiotic resistance via natural transformation / antibiotic challenge | Fig. 5A-D, Fig. S4A-D            | E7946 Sm <sup>R</sup> , $P_{tac-tfoX}$ , $\Delta luxO$ , <i>pilA S67C</i> , <i>comEA-mCherry</i> , $\Delta lacZ::lacIq$ , $\Delta VC1807::Cm^R$                                                                                                                                               | This study / TND0904 (SAD2436) |
| Testing epigenetic inheritance of kanamycin / erythromycin resistance via time lapse microscopy           | Fig. 6, movies S3-S4, Fig. S5A-B | E7946 Sm <sup>R</sup> , $P_{tac-tfoX}$ , $\Delta luxO$ , <i>pilA S67C</i> , $\Delta VC1807::Cm^R-P_{tac-gfp*::parS_{MT1}}$ , $\Delta lacZ::P_{lac-CFP-parB_{P1}}$ <i>mCherry-parB<sub>MT1}</sub> Zeo<sup>R</sup></i>                                                                          | This study / TND1449 (SAD2442) |

|                                                                                                                                         |                                         |                                                                                                                                                                                                                                                                                                                                 |                                |
|-----------------------------------------------------------------------------------------------------------------------------------------|-----------------------------------------|---------------------------------------------------------------------------------------------------------------------------------------------------------------------------------------------------------------------------------------------------------------------------------------------------------------------------------|--------------------------------|
| Testing epigenetic inheritance of chloramphenicol resistance via time lapse microscopy                                                  | Fig. S5A-C, movie S5                    | E7946 Sm <sup>R</sup> , P <sub>tac</sub> - <i>tfoX</i> , $\Delta$ <i>luxO</i> , <i>pilA</i> S67C, $\Delta$ VC1807::Erm <sup>R</sup> -P <sub>tac</sub> - <i>gfp</i> *:: <i>parS</i> <sub>MT1</sub> , $\Delta$ <i>lacZ</i> ::P <sub>tac</sub> -CFP- <i>parB</i> <sub>P1</sub> <i>mCherry-parB</i> <sub>MT1</sub> Zeo <sup>R</sup> | This study / TND1458 (SAD2443) |
| Parent strain used to generate all of the <i>S. pneumoniae</i> strains for this study.                                                  | N/A                                     | Rx1 <i>hex malM511 str-1 bgl-1</i> ; low- $\alpha$ -galactosidase background; Sm <sup>R</sup> , $\Delta$ <i>cps</i> , $\Delta$ <i>cheshire comA</i> <sup>-</sup> Cm <sup>R</sup>                                                                                                                                                | (Weng et al., 2009)            |
| <i>S. pneumoniae</i> host for testing epigenetic inheritance of antibiotic resistance via natural transformation / antibiotic challenge | Fig. 5E-H                               | Rx1 <i>hex malM511 str-1 bgl-1</i> ; low- $\alpha$ -galactosidase background; Sm <sup>R</sup> , $\Delta$ <i>cps</i> , $\Delta$ <i>cheshire comA</i> <sup>-</sup> Cm <sup>R</sup> , $\Delta$ <i>nanB</i> ::Erm <sup>R</sup>                                                                                                      | This study / SAD2403           |
| <b>Strain gDNA used as template to amplify tDNA</b>                                                                                     |                                         |                                                                                                                                                                                                                                                                                                                                 |                                |
| <b>Use(s)</b>                                                                                                                           | <b>Relevant figure(s)</b>               | <b>Relevant tDNA genotype and primers used to amplify up the PCR product (see Table S2 for primer sequences)</b>                                                                                                                                                                                                                | <b>Reference / (strain#)</b>   |
| -success rates for tDNA integration<br>-testing ssDNA vs dsDNA integration                                                              | Fig. 2A-H, Fig. 3A-C, Fig. S2, movie S1 | tDNA = 0.11 Mbp:: <i>parS</i> <sub>MT1</sub><br>Amplified with: BBC1852 / BBC1855                                                                                                                                                                                                                                               | This study / SAD1924           |
| -assess ComM focus duration<br>-colocalization of ComM foci with genomic loci                                                           | Fig. 1A-F, Fig. S1A-B                   | tDNA = 0.102 Mbp WT<br>Amplified with: BBC1981 / BBC1984                                                                                                                                                                                                                                                                        | This study / SAD033            |
| -colocalization with genomic loci<br>-natural transformation / kanamycin challenge                                                      | Fig. S1C-E, Fig. 5A-D, Fig. S4C         | tDNA = $\Delta$ VC1807::Kan <sup>R</sup><br>Amplified with: BBC1881 / BBC1882                                                                                                                                                                                                                                                   | This study / SAD034            |
| -natural transformation / spectinomycin challenge                                                                                       | Fig. S4D                                | tDNA = $\Delta$ VC1807::Spec <sup>R</sup><br>Amplified with: BBC1881 / BBC1882                                                                                                                                                                                                                                                  | This study / SAD033            |
| -natural transformation / kanamycin challenge in <i>S. pneumoniae</i>                                                                   | Fig. 5E-H                               | tDNA = $\Delta$ <i>nanB</i> ::Kan <sup>R</sup><br>Amplified with: BBC2853 / BBC2856                                                                                                                                                                                                                                             | This study / BBC2402           |
| -colocalize DNA integration and ComM foci<br>-tracking epigenetic inheritance of GFP                                                    | Fig. S3A-B, Fig. 4A-C, movie S2         | tDNA = $\Delta$ VC1807::Cm <sup>R</sup> -P <sub>tac</sub> - <i>gfp</i><br>Amplified with: BBC1881 / BBC1882                                                                                                                                                                                                                     | This study / TND1166 (SAD2437) |
| -Time lapse microscopy to test epigenetic inheritance of kanamycin resistance                                                           | Fig. 6, movie S3                        | tDNA = $\Delta$ VC1807:: <i>parS</i> <sub>P1</sub> -Kan <sup>R</sup> -P <sub>tac</sub> - <i>gfp</i><br>Amplified with: BBC1881 / BBC1882                                                                                                                                                                                        | This study / TND1513 (SAD2446) |



|                                                                                  |                    |                                                                                                        |                                |
|----------------------------------------------------------------------------------|--------------------|--------------------------------------------------------------------------------------------------------|--------------------------------|
| -Time lapse microscopy to test epigenetic inheritance of erythromycin resistance | Fig. S5B, movie S4 | <u>tDNA</u> = $\Delta VC1807::parS_{P1}-Erm^R-P_{tac}-gfp$<br><u>Amplified with:</u> BBC1881 / BBC1882 | This study / TND1492 (SAD2444) |
| -Time lapse microscopy to test epigenetic inheritance of erythromycin resistance | Fig. S5C, movie S5 | <u>tDNA</u> = $\Delta VC1807::parS_{P1}-Cm^R-P_{tac}-gfp$<br><u>Amplified with:</u> BBC1881 / BBC1882  | This study / TND1498 (SAD2445) |

**Table S2 – Primers used in this study**

| Primer Name | Primer Sequence (5'→3')                                                                                                  | Description                                                                                                                                                                              |
|-------------|--------------------------------------------------------------------------------------------------------------------------|------------------------------------------------------------------------------------------------------------------------------------------------------------------------------------------|
| BBC1852     | CTGTTCTCCTATGCTTGAGAGAG                                                                                                  | 0.11 Mbp::XX F1                                                                                                                                                                          |
| BBC1853     | catggttattgttgattataaaggaaaattgaaaattctttcaca<br>ctgaaatcaccacgcttttcaacctctctgactcataatttcgc<br>gCGCATGCGGTGGCCTTGTTG   | 0.11 Mbp::parS <sub>MT1</sub> R1                                                                                                                                                         |
| BBC1854     | gaattttcaattttcctttataatcaacaaataacctgaaattg<br>gcggtggtgaaaaacatacaaaaaagatgctcttcggcatcctg<br>aattcGTGGCCTTGTTGTTTGTGC | 0.11 Mbp::parS <sub>MT1</sub> F2                                                                                                                                                         |
| BBC1855     | AACATCGCCGAATTTGTTGG                                                                                                     | 0.11 Mbp::XX R2                                                                                                                                                                          |
| BBC1978     | cacctgaaatttagagtaatttactttaaaaacagtcagttaat<br>agtgaaattgaaatggcgaCGCATGCGGTGGCCTT<br>GTTG                              | 0.11 Mbp::parS <sub>P1</sub> R1                                                                                                                                                          |
| BBC1979     | aactgactgttttaagtaaataactctaaaattcaaggtgaaa<br>tcgccacgatttcacGTGGCCTTGTTGTTTGTGC                                        | 0.11 Mbp::parS <sub>P1</sub> F2                                                                                                                                                          |
| BBC1856     | aaagatgctcttcggcatcctg                                                                                                   | Detect parS <sub>MT1</sub> F                                                                                                                                                             |
| BBC1857     | CACTGGAAAAGCAGAATTTAC                                                                                                    | Detect 0.11 Mbp::ParS <sub>XX</sub> R                                                                                                                                                    |
| BBC2551     | cgccattcaaattcactattaactgac                                                                                              | Detect parS <sub>P1</sub> F                                                                                                                                                              |
| BBC2694     | gaagcagctccagcctacaCGGTCTTAAATGACTC<br>GCGAG                                                                             | 0.11 Mbp::Ab <sup>R</sup> (where Ab <sup>R</sup> is Cm <sup>R</sup> ,<br>Erm <sup>R</sup> , or Kan <sup>R</sup> ) R1                                                                     |
| BBC2695     | gtcgacggatccccggaatCATTCCACAACAAGGC<br>CAC                                                                               | 0.11 Mbp::Ab <sup>R</sup> (where Ab <sup>R</sup> is Cm <sup>R</sup> ,<br>Erm <sup>R</sup> , or Kan <sup>R</sup> ) F2                                                                     |
| ABD123      | ATTCCGGGGATCCGTCGAC                                                                                                      | Cm <sup>R</sup> , Erm <sup>R</sup> , or Kan <sup>R</sup> F                                                                                                                               |
| ABD124      | TGTAGGCTGGAGCTGCTTC                                                                                                      | Cm <sup>R</sup> , Erm <sup>R</sup> , or Kan <sup>R</sup> F                                                                                                                               |
| BBC1981     | TTTATCACAGAGTTATCCACAGG                                                                                                  | 0.102 Mbp F1                                                                                                                                                                             |
| BBC1984     | TTTTGCCAGACCAAACGCAC                                                                                                     | 0.102 Mbp R2                                                                                                                                                                             |
| BBC2439     | AAGTGGGTCAACACATTCTC                                                                                                     | 1.963 Mbp::parS <sub>XX</sub> F1                                                                                                                                                         |
| BBC2440     | ctctctgactcataatttcgagAGAAAATGAGCCCTT<br>TGGG                                                                            | 1.963 Mbp::parS <sub>XX</sub> R1                                                                                                                                                         |
| BBC2441     | gatgctcttcggcatcctgaattcATCTCAAGTGTAGT<br>GATTCAGAATG                                                                    | 1.963 Mbp::parS <sub>XX</sub> F2                                                                                                                                                         |
| BBC2444     | CTATGTCTGCAAACATCACATGG                                                                                                  | 1.963 Mbp::parS <sub>XX</sub> R2                                                                                                                                                         |
| BBC2413     | cgcgaaattatgagtcacg                                                                                                      | parS <sub>MT1</sub> F                                                                                                                                                                    |
| BBC2414     | gaattcaggatgccgaagag                                                                                                     | parS <sub>MT1</sub> R                                                                                                                                                                    |
| BBC2552     | cgcgaaattatgagtcacgaagaGtcgccattcaaattcact<br>attaactgac                                                                 | parS <sub>P1</sub> F                                                                                                                                                                     |
| BBC2553     | gaattcaggatgccgaagagcatCgtgaaatcgtggcgatttc<br>accttg                                                                    | parS <sub>P1</sub> R                                                                                                                                                                     |
| BBC2445     | GCCAACGGTATCATCAATCG                                                                                                     | Detect 1.963 Mbp::parS <sub>XX</sub> R                                                                                                                                                   |
| ABD256      | CCCAAATACGGCAACTTGCGC                                                                                                    | Replace yGFP from $\Delta lacZ::P_{lac^-}$<br>yGFP-parB <sub>MT1</sub> Zeo <sup>R</sup> with CyPet to<br>make $\Delta lacZ::P_{lac^-}$ -cyPet-parB <sub>MT1</sub><br>Zeo <sup>R</sup> F1 |
| BBC1976     | cctctccctgctcaccatGGTGAATTCCTCCTGCTA<br>GC                                                                               | Replace yGFP from $\Delta lacZ::P_{lac^-}$<br>yGFP-parB <sub>MT1</sub> Zeo <sup>R</sup> with CyPet to<br>make $\Delta lacZ::P_{lac^-}$ -cyPet-parB <sub>MT1</sub><br>Zeo <sup>R</sup> R1 |

|         |                                                        |                                                                                                                                                                                                                                             |
|---------|--------------------------------------------------------|---------------------------------------------------------------------------------------------------------------------------------------------------------------------------------------------------------------------------------------------|
| BBC1977 | catcaccacggcatggacGAGCTGTATAAATCGT<br>ACGGC            | Replace yGFP from $\Delta lacZ::P_{lac}$ -yGFP-parB <sub>MT1</sub> Zeo <sup>R</sup> with CyPet to make $\Delta lacZ::P_{lac}$ -cyPet-parB <sub>MT1</sub> Zeo <sup>R</sup> F2                                                                |
| ABD332  | GGCTGAACGTGGTTGTGCGAAAATGAC                            | Replace yGFP from $\Delta lacZ::P_{lac}$ -yGFP-parB <sub>MT1</sub> Zeo <sup>R</sup> with CyPet to make $\Delta lacZ::P_{lac}$ -cyPet-parB <sub>MT1</sub> Zeo <sup>R</sup> R2                                                                |
| BBC1974 | ATGGTGAGCAAGGGAGAGG                                    | cyPet F                                                                                                                                                                                                                                     |
| BBC1975 | GTCCATGCCGTGGGTGATG                                    | cyPet R                                                                                                                                                                                                                                     |
| ABD256  | CCCAAATACGGCAACTTGGCG                                  | Insert CFP-parB <sub>P1</sub> upstream of yGFP-parB <sub>MT1</sub> in $\Delta lacZ::P_{lac}$ -yGFP-parB <sub>MT1</sub> Zeo <sup>R</sup> to make $\Delta lacZ::P_{lac}$ -CFP-parB <sub>P1</sub> yGFP-parB <sub>MT1</sub> Zeo <sup>R</sup> F1 |
| BBC1970 | CTGTTTCCTGTGTGAAATTGTTATC                              | Insert CFP-parB <sub>P1</sub> upstream of yGFP-parB <sub>MT1</sub> in $\Delta lacZ::P_{lac}$ -yGFP-parB <sub>MT1</sub> Zeo <sup>R</sup> to make $\Delta lacZ::P_{lac}$ -CFP-parB <sub>P1</sub> yGFP-parB <sub>MT1</sub> Zeo <sup>R</sup> R1 |
| BBC1971 | GCTAGCAGGAGGAATTCACC                                   | Insert CFP-parB <sub>P1</sub> upstream of yGFP-parB <sub>MT1</sub> in $\Delta lacZ::P_{lac}$ -yGFP-parB <sub>MT1</sub> Zeo <sup>R</sup> to make $\Delta lacZ::P_{lac}$ -CFP-parB <sub>P1</sub> yGFP-parB <sub>MT1</sub> Zeo <sup>R</sup> F2 |
| ABD332  | GGCTGAACGTGGTTGTGCGAAAATGAC                            | Insert CFP-parB <sub>P1</sub> upstream of yGFP-parB <sub>MT1</sub> in $\Delta lacZ::P_{lac}$ -yGFP-parB <sub>MT1</sub> Zeo <sup>R</sup> to make $\Delta lacZ::P_{lac}$ -CFP-parB <sub>P1</sub> yGFP-parB <sub>MT1</sub> Zeo <sup>R</sup> R2 |
| BBC1972 | ggataacaatttcacacaggaacagTTTCACACAGG<br>AAACAGACC      | CFP-parB <sub>P1</sub> F                                                                                                                                                                                                                    |
| BBC1973 | catggtgaattcctcctgctagcTTAATAGTGAAATTT<br>GAATGGCGAAAG | CFP-parB <sub>P1</sub> R                                                                                                                                                                                                                    |
| BBC1747 | AACATCCGTTAGACAATGACC                                  | Replace yGFP in $\Delta lacZ::P_{lac}$ -CFP-parB <sub>P1</sub> yGFP-parB <sub>MT1</sub> Zeo <sup>R</sup> with mCherry to make $\Delta lacZ::P_{lac}$ -CFP-parB <sub>P1</sub> mCherry-parB <sub>MT1</sub> Zeo <sup>R</sup> F1                |
| BBC2669 | cctcctcgcccttgctcacCATGGTGAATTCCTCCTG<br>CTAGC         | Replace yGFP in $\Delta lacZ::P_{lac}$ -CFP-parB <sub>P1</sub> yGFP-parB <sub>MT1</sub> Zeo <sup>R</sup> with mCherry to make $\Delta lacZ::P_{lac}$ -CFP-parB <sub>P1</sub> mCherry-parB <sub>MT1</sub> Zeo <sup>R</sup> R1                |
| BBC2664 | GAGCTGTATAAATCGTACGGC                                  | Replace yGFP in $\Delta lacZ::P_{lac}$ -CFP-parB <sub>P1</sub> yGFP-parB <sub>MT1</sub> Zeo <sup>R</sup> with mCherry to make $\Delta lacZ::P_{lac}$ -CFP-parB <sub>P1</sub> mCherry-parB <sub>MT1</sub> Zeo <sup>R</sup> F2                |
| ABD332  | GGCTGAACGTGGTTGTGCGAAAATGAC                            | Replace yGFP in $\Delta lacZ::P_{lac}$ -CFP-parB <sub>P1</sub> yGFP-parB <sub>MT1</sub> Zeo <sup>R</sup> with mCherry to make $\Delta lacZ::P_{lac}$ -CFP-parB <sub>P1</sub> mCherry-parB <sub>MT1</sub> Zeo <sup>R</sup> R2                |
| BBC2144 | gtgagcaagggcgaggagg                                    | mCherry F                                                                                                                                                                                                                                   |
| BBC2665 | GCCGTACGATTTATACAGCTCgtccatgccgccc<br>gtgga            | mCherry R                                                                                                                                                                                                                                   |
| BBC1881 | TTTAAAGGGGATCAGTGACCG                                  | $\Delta VC1807::XX$ F1                                                                                                                                                                                                                      |

|         |                                                            |                                                                                                                                                                                                                          |
|---------|------------------------------------------------------------|--------------------------------------------------------------------------------------------------------------------------------------------------------------------------------------------------------------------------|
| BBC244  | ctcttcgtgactcataatttcgcgAGAAAATGAGCCCTT<br>TGGG            | $\Delta VC1807::Cm^R-P_{tac}-gfp$ R1                                                                                                                                                                                     |
| ABD340  | gtcgacgatccccggaatACGTTTCATTAGTCACC<br>TCTATTGTTAACTTGTTTC | $\Delta VC1807::Ab^R$ R1                                                                                                                                                                                                 |
| ABD341  | gaagcagctccagcctacaTAGTCGAAAATAAAAA<br>AAAGAGGCTCGCCTC     | $\Delta VC1807::XX$ F2                                                                                                                                                                                                   |
| BBC1882 | CAATTTTGCTTTTGGACCATCCC                                    | $\Delta VC1807::XX$ R2                                                                                                                                                                                                   |
| BBC252  | tccaccacttcacctgcCGCTTTAATCACCTTGGC                        | <i>gfp</i> F                                                                                                                                                                                                             |
| BBC254  | CCTTGATGCCATCGAGTAC                                        | <i>gfp</i> R                                                                                                                                                                                                             |
| ABD344  | GATTAGCAACGATTCTAGCGCAGGAG                                 | Disrupt <i>gfp</i> in $\Delta VC1807::Cm^R-P_{tac}-gfp$ with <i>parS<sub>MT1</sub></i> to make $\Delta VC1807::Cm^R-P_{tac}-gfp::parS_{MT1}$ F1                                                                          |
| BBC2579 | ctcttcgtgactcataatttcgcgGCTCATTTCAGAATA<br>TTTGCCAG        | Disrupt <i>gfp</i> in $\Delta VC1807::Cm^R-P_{tac}-gfp$ with <i>parS<sub>MT1</sub></i> to make $\Delta VC1807::Cm^R-P_{tac}-gfp::parS_{MT1}$ R1                                                                          |
| BBC2416 | gatgctcttcggcatcctgaattcAAACTACCTGTTCCA<br>TGCC            | Disrupt <i>gfp</i> in $\Delta VC1807::Cm^R-P_{tac}-gfp$ with <i>parS<sub>MT1</sub></i> to make $\Delta VC1807::Cm^R-P_{tac}-gfp::parS_{MT1}$ F2                                                                          |
| ABD345  | CTTGCTAACCGTTGGTGTACCAGC                                   | Disrupt <i>gfp</i> in $\Delta VC1807::Cm^R-P_{tac}-gfp$ with <i>parS<sub>MT1</sub></i> to make $\Delta VC1807::Cm^R-P_{tac}-gfp::parS_{MT1}$ R2                                                                          |
| ABD342  | ATTTTTCAGTTGGCCTACAATGCTTTCC                               | Delete $Cm^R$ cassette in $\Delta VC1807::Cm^R-P_{tac}-gfp$ and replace with <i>parS<sub>P1</sub></i> and $Ab^R$ to make $\Delta VC1807::parS_{P1}-Ab^R-P_{tac}-gfp$ (where $Ab^R$ is $Kan^R$ , $Cm^R$ , or $Erm^R$ ) F1 |
| BBC719  | CACCATACCCACGCCGAAACAAGGATTTTG<br>AATTAACGTTTCATTAGTC      | Delete $Cm^R$ cassette in $\Delta VC1807::Cm^R-P_{tac}-gfp$ and replace with <i>parS<sub>P1</sub></i> and $Ab^R$ to make $\Delta VC1807::parS_{P1}-Ab^R-P_{tac}-gfp$ (where $Ab^R$ is $Kan^R$ , $Cm^R$ , or $Erm^R$ ) R2 |
| BBC2698 | TTGCACCATTTCGATGGTGTC                                      | Delete $Cm^R$ cassette in $\Delta VC1807::Cm^R-P_{tac}-gfp$ and replace with <i>parS<sub>P1</sub></i> and $Ab^R$ to make $\Delta VC1807::parS_{P1}-Ab^R-P_{tac}-gfp$ (where $Ab^R$ is $Kan^R$ , $Cm^R$ , or $Erm^R$ ) F2 |
| ABD345  | CTTGCTAACCGTTGGTGTACCAGC                                   | Delete $Cm^R$ cassette in $\Delta VC1807::Cm^R-P_{tac}-gfp$ and replace with <i>parS<sub>P1</sub></i> and $Ab^R$ to make $\Delta VC1807::parS_{P1}-Ab^R-P_{tac}-gfp$ (where $Ab^R$ is $Kan^R$ , $Cm^R$ , or $Erm^R$ ) R2 |
| BBC2716 | ttgtttcggcgtgggatgggtgCTTCCGCTCAGTCATC<br>CTG              | <i>parS<sub>XX</sub>-Ab<sup>R</sup></i> F                                                                                                                                                                                |
| BBC2717 | gacaccatcgaatgggtgcaaTGTAGGCTGGAGCTG<br>CTTC               | <i>parS<sub>XX</sub>-Ab<sup>R</sup></i> R                                                                                                                                                                                |

|         |                                                    |                                                                                                                                                                                                            |
|---------|----------------------------------------------------|------------------------------------------------------------------------------------------------------------------------------------------------------------------------------------------------------------|
| BBC1881 | TTTAAAGGGGATCAGTGACCG                              | Replace Cm <sup>R</sup> in $\Delta VC1807::Cm^R$ - <i>P<sub>tac</sub>-gfp::parS<sub>MT1</sub></i> with Erm <sup>R</sup> to make $\Delta VC1807::Erm^R$ - <i>P<sub>tac</sub>-gfp::parS<sub>MT1</sub></i> F1 |
| CKP236  | gaagcagctccagcctacaAAATTATAAGGGGCCTGCCACC          | Replace Cm <sup>R</sup> in $\Delta VC1807::Cm^R$ - <i>P<sub>tac</sub>-gfp::parS<sub>MT1</sub></i> with Erm <sup>R</sup> to make $\Delta VC1807::Erm^R$ - <i>P<sub>tac</sub>-gfp::parS<sub>MT1</sub></i> R1 |
| CKP235  | gtcgacggatccccggaatCAAATATATCCTCCTCACTATTTTGATTAG  | Replace Cm <sup>R</sup> in $\Delta VC1807::Cm^R$ - <i>P<sub>tac</sub>-gfp::parS<sub>MT1</sub></i> with Erm <sup>R</sup> to make $\Delta VC1807::Erm^R$ - <i>P<sub>tac</sub>-gfp::parS<sub>MT1</sub></i> F2 |
| BBC2660 | GCTCATTTCAGAATATTTGCCAG                            | Replace Cm <sup>R</sup> in $\Delta VC1807::Cm^R$ - <i>P<sub>tac</sub>-gfp::parS<sub>MT1</sub></i> with Erm <sup>R</sup> to make $\Delta VC1807::Erm^R$ - <i>P<sub>tac</sub>-gfp::parS<sub>MT1</sub></i> R2 |
| BBC2853 | GCTACAACCTAGTACTGAACCAC                            | $\Delta nanB::Ab^R$ F1                                                                                                                                                                                     |
| BBC2854 | gtcgacggatccccggaatAATTCCTAGTTTTGAATAAAGACCTC      | $\Delta nanB::Ab^R$ R1                                                                                                                                                                                     |
| BBC2855 | gaagcagctccagcctacaTCGTGGTCGAGAAATGAATTGC          | $\Delta nanB::Ab^R$ F2                                                                                                                                                                                     |
| BBC2856 | TATAGAACCGGACTGACGAATAG                            | $\Delta nanB::Ab^R$ R2                                                                                                                                                                                     |
| BBC2846 | attccggggatccgtcgacTAGGATCCGTTTGATTTTAATGGATAATG   | Amplify Erm <sup>R</sup> or Kan <sup>R</sup> cassette for <i>S. pneumoniae</i> F                                                                                                                           |
| BBC2847 | tgtaggctggagctgcttcGAATTCTAGGTACTAAAA CAATTCATCCAG | Amplify Kan <sup>R</sup> cassette for <i>S. pneumoniae</i> R                                                                                                                                               |
| BBC2848 | tgtaggctggagctgcttcGTACCGTATTATTTCCCTCCG           | Amplify Erm <sup>R</sup> cassette for <i>S. pneumoniae</i> R                                                                                                                                               |

## Supplemental Movie Legends

**Movie S1 – tDNA integrates as ssDNA during NT and the resulting heteroduplex is resolved by chromosome replication.** Time lapse of the cell shown in **Fig. 3B**. Cells in this experiment constitutively expressed yGFP-parB1/CFP-parB2 and contained a *parS2* site in the genome. Cells were then transformed with tDNA that would replace the *parS2* site with a *parS1* site. For a schema of the experimental setup see **Fig. 3A**. This experiment was repeated independently two times with similar results. The capture interval is 3 min between frames. Scale bar is 2  $\mu\text{m}$ .

**Movie S2 – Epigenetic inheritance of tDNA-derived GFP during NT.** Time lapse of the cell shown in **Fig. 4B**. Cells in this experiment contained *parS1* (red ParB1) and *parS2* (blue ParB2) sites in close proximity on the chromosome. The *parS1* site interrupted a chromosomally integrated *gfp* gene. Cells were transformed with tDNA to delete the *parS1* site and restore the *gfp* gene. For a schema of the experimental setup see **Fig. S4A**. This experiment was repeated independently three times with similar results. The capture interval is 3 min between frames. Scale bar is 2  $\mu\text{m}$ .

**Movie S3 – Single cell assay to demonstrate transgenerational epigenetic inheritance of kanamycin resistance during NT.** Time lapse of the cells shown in **Fig. 6**. Cell in this experiment constitutively expressed mCherry-ParB1/CFP-ParB2 and contained a *parS1* site in the genome that disrupts a *gfp* gene. Cells were then incubated with tDNA that would remove the *parS1* site, restore the *gfp* gene, and integrate a *parS2* site linked to a Kan<sup>R</sup> marker. Imaging was performed under an M9+glucose pad containing 100  $\mu\text{g}/\text{mL}$  kanamycin. For a schema of the experimental setup see **Fig. S5A**. This experiment was repeated independently two times with similar results. The capture interval is 5 min between frames. Scale bar is 2  $\mu\text{m}$ .

**Movie S4 – Single cell assay to demonstrate transgenerational epigenetic inheritance of erythromycin resistance during NT.** Time lapse of the cells shown in **Fig. S5B**. Cell in this experiment constitutively expressed mCherry-ParB1/CFP-ParB2 and contained a *parS1* site in the genome that disrupts a *gfp* gene. Cells were then incubated with tDNA that would remove the *parS1* site, restore the *gfp* gene, and integrate a *parS2* site linked to an Erm<sup>R</sup> marker. Imaging was performed under an M9+glucose pad containing 10  $\mu\text{g}/\text{mL}$  erythromycin. For a schema of the experimental setup see **Fig. S5A**. This experiment was repeated independently two times with similar results. The capture interval is 10 min between frames. Scale bar is 2  $\mu\text{m}$ .

**Movie S5 – Single cell assay to demonstrate transgenerational epigenetic inheritance of chloramphenicol resistance during NT.** Time lapse of the cells shown in **Fig. S5C**. Cell in this experiment constitutively expressed mCherry-ParB1/CFP-ParB2 and contained a *parS1* site in the genome that disrupts a *gfp* gene. Cells were then incubated with tDNA that would remove the *parS1* site, restore the *gfp* gene, and integrate a *parS2* site linked to an Cm<sup>R</sup> marker. Imaging was performed under an M9+glucose pad containing 2  $\mu\text{g}/\text{mL}$  chloramphenicol. For a schema of the experimental setup see **Fig. S5A**. This experiment was repeated independently two times with similar results. The capture interval is 10 min between frames. Scale bar is 2  $\mu\text{m}$ .
